# Supplementary material for: Metal–organic framework-catalyzed selective oxidation of alcohols and oxidative cross-coupling for C–C and C–N bond-forming reactions
Source: Royal Society of Chemistry journal article supplement (doi:10.1039/d3nj05260e), 2024-01-01
Supplement: d3nj05260e1.pdf [file d3nj05260e1.pdf]

## Supporting Information

### Metal Organic Framework Catalyzed Selective Oxidation of Alcohols and Oxidative Cross-Coupling for the C-C and C-N Bond Forming Reactions

Sheik Allavudeen Abdul Rahman,<sup>a</sup> Chandrima N. Patra,<sup>a</sup> Goutam Kumar Kole,<sup>b</sup> Silda Peters,<sup>b</sup> Tumpa Sadhukhan,<sup>b</sup> Baburaj Baskar\*<sup>a</sup>

<sup>a</sup>Laboratory of Sustainable Chemistry, Department of Chemistry, College of Engineering and Technology, SRM Institute of Science and Technology, Kattankulathur – 603203, Tamilnadu, India. Ph. No: +91 -9444741149; e-mail: baskarb@srmist.edu.in

<sup>b</sup>Department of Chemistry, College of Engineering and Technology, SRM Institute of Science and Technology, Kattankulathur – 603203, Tamilnadu, India.

#### Table of Contents

|                                                                                  |         |
|----------------------------------------------------------------------------------|---------|
| 1. Crystallographic information of <b>3a</b>                                     | S2-S5   |
| 2. Computational details of <b>3a</b>                                            | S6-S9   |
| 3. Experimental investigation of <b>3a</b>                                       | S10-S11 |
| 4. <sup>1</sup> H and <sup>13</sup> C NMR spectra of <b>2a-2m</b> & <b>6a-6o</b> | S12-S39 |
| 5. References                                                                    | S40     |

## 1. Crystallographic data

**Table SI-1: Crystallographic parameters for Co(btc)(bpy) catalyst (MOF-3a)**

| Compound                                                | Co(btc)(bpy)                                                                    |
|---------------------------------------------------------|---------------------------------------------------------------------------------|
| CCDC No.                                                | 2320389                                                                         |
| Formula                                                 | C <sub>60</sub> H <sub>62</sub> Co <sub>3</sub> N <sub>10</sub> O <sub>22</sub> |
| Formula weight<br>(g.mol <sup>-1</sup> )                | 1451.99                                                                         |
| Temperature (K)                                         | 100(2)                                                                          |
| Radiation, λ (Å)                                        | Mo Kα (λ =0.71073)                                                              |
| Crystal Colour, habit                                   | Violet, Block                                                                   |
| Crystal size (mm <sup>3</sup> )                         | 0.435 × 0.110 × 0.085                                                           |
| Crystal system                                          | Triclinic                                                                       |
| Space Group                                             | <i>P</i> <sup>1</sup>                                                           |
| Unit cell dimensions                                    |                                                                                 |
| <i>a</i> (Å)                                            | 14.2087(11)                                                                     |
| <i>b</i> (Å)                                            | 15.1919(12)                                                                     |
| <i>c</i> (Å)                                            | 16.8364(12)                                                                     |
| <i>α</i> (°)                                            | 79.338(3)                                                                       |
| <i>β</i> (°)                                            | 72.665(3)                                                                       |
| <i>γ</i> (°)                                            | 69.525(3)                                                                       |
| Volume (Å <sup>3</sup> )                                | 3236.7(4)                                                                       |
| <i>Z</i>                                                | 2                                                                               |
| Calculated density (Mg.m <sup>-3</sup> )                | 1.490                                                                           |
| μ (mm <sup>-1</sup> )                                   | 0.845                                                                           |
| θ range (°)                                             | 2.545 to 25.760                                                                 |
| Reflections collected                                   | 117105                                                                          |
| Independent reflections                                 | 12357                                                                           |
| Parameters/ restraints                                  | 1034 / 273                                                                      |
| GooF on F <sup>2</sup>                                  | 1.135                                                                           |
| R <sub>1</sub> [ <i>I</i> >2σ( <i>I</i> )] <sup>a</sup> | 0.0578                                                                          |
| wR <sub>2</sub> (all data) <sup>b</sup>                 | 0.1593                                                                          |

**Table SI-2 Selected bond distance and bond angles for Co(btc)(bpy) catalyst (MOF-3a)**

| Atoms    | Bond distance (Å) | Atoms         | Bond angle (°) | Atoms         | Bond angle (°) |
|----------|-------------------|---------------|----------------|---------------|----------------|
| Co1-O1_1 | 1.998(10)         | O1_1-Co1-O1_6 | 91.5(4)        | O6_4-Co2-N1_3 | 141.3(4)       |
| Co1-O1_6 | 2.076(8)          | O1_1-Co1-N1_5 | 95.0(5)        | O5_1-Co2-N2_3 | 171.5(4)       |
| Co1-N1_5 | 2.104(12)         | O1_6-Co1-N1_5 | 111.3(4)       | O1_4-Co2-N2_3 | 84.5(4)        |
| Co1-N2_5 | 2.131(11)         | O1_1-Co1-N2_5 | 170.2(4)       | O6_4-Co2-N2_3 | 90.8(4)        |
| Co1-O4_4 | 2.183(9)          | O1_6-Co1-N2_5 | 89.6(4)        | N1_3-Co2-N2_3 | 76.9(5)        |
| Co1-O3_4 | 2.189(9)          | N1_5-Co1-N2_5 | 75.6(5)        | O5_1-Co2-O5_4 | 85.3(3)        |

|          |           |               |          |               |          |
|----------|-----------|---------------|----------|---------------|----------|
| Co1-C2_4 | 2.505(13) | O1_1-Co1-O4_4 | 94.0(4)  | O1_4-Co2-O5_4 | 147.3(3) |
| Co2-O5_1 | 2.036(9)  | O1_6-Co1-O4_4 | 149.9(4) | O6_4-Co2-O5_4 | 58.1(3)  |
| Co2-O1_4 | 2.049(10) | N1_5-Co1-O4_4 | 97.8(4)  | N1_3-Co2-O5_4 | 87.4(3)  |
| Co2-O6_4 | 2.080(8)  | N2_5-Co1-O4_4 | 89.9(4)  | N2_3-Co2-O5_4 | 98.9(4)  |
| Co2-N1_3 | 2.103(10) | O1_1-Co1-O3_4 | 92.3(4)  | O6_1-Co3-O2_4 | 93.9(4)  |
| Co2-N2_3 | 2.130(11) | O1_6-Co1-O3_4 | 91.1(3)  | O6_1-Co3-O4_1 | 90.2(4)  |
| Co2-O5_4 | 2.396(9)  | N1_5-Co1-O3_4 | 156.3(4) | O2_4-Co3-O4_1 | 97.7(4)  |
| Co3-O6_1 | 2.035(8)  | N2_5-Co1-O3_4 | 97.4(4)  | O6_1-Co3-N1_2 | 85.1(4)  |
| Co3-O2_4 | 2.039(8)  | O4_4-Co1-O3_4 | 59.1(3)  | O2_4-Co3-N1_2 | 170.5(4) |
| Co3-O4_1 | 2.077(10) | O1_1-Co1-C2_4 | 91.2(4)  | O4_1-Co3-N1_2 | 91.8(4)  |
| Co3-N1_2 | 2.108(10) | O1_6-Co1-C2_4 | 120.2(4) | O6_1-Co3-N2_2 | 122.0(4) |
| Co3-N2_2 | 2.113(10) | N1_5-Co1-C2_4 | 128.0(4) | O2_4-Co3-N2_2 | 96.3(4)  |
| Co3-O3_1 | 2.309(9)  | N2_5-Co1-C2_4 | 96.6(4)  | O4_1-Co3-N2_2 | 143.7(3) |
|          |           | O4_4-Co1-C2_4 | 30.2(3)  | N1_2-Co3-N2_2 | 76.4(4)  |
|          |           | O3_4-Co1-C2_4 | 29.1(3)  | O6_1-Co3-O3_1 | 149.3(4) |
|          |           | O5_1-Co2-O1_4 | 96.0(4)  | O2_4-Co3-O3_1 | 90.1(3)  |
|          |           | O5_1-Co2-O6_4 | 97.7(4)  | O4_1-Co3-O3_1 | 59.2(3)  |
|          |           | O1_4-Co2-O6_4 | 89.5(4)  | N1_2-Co3-O3_1 | 95.6(4)  |
|          |           | O5_1-Co2-N1_3 | 95.9(4)  | N2_2-Co3-O3_1 | 87.6(3)  |
|          |           | O1_4-Co2-N1_3 | 124.8(4) |               |          |

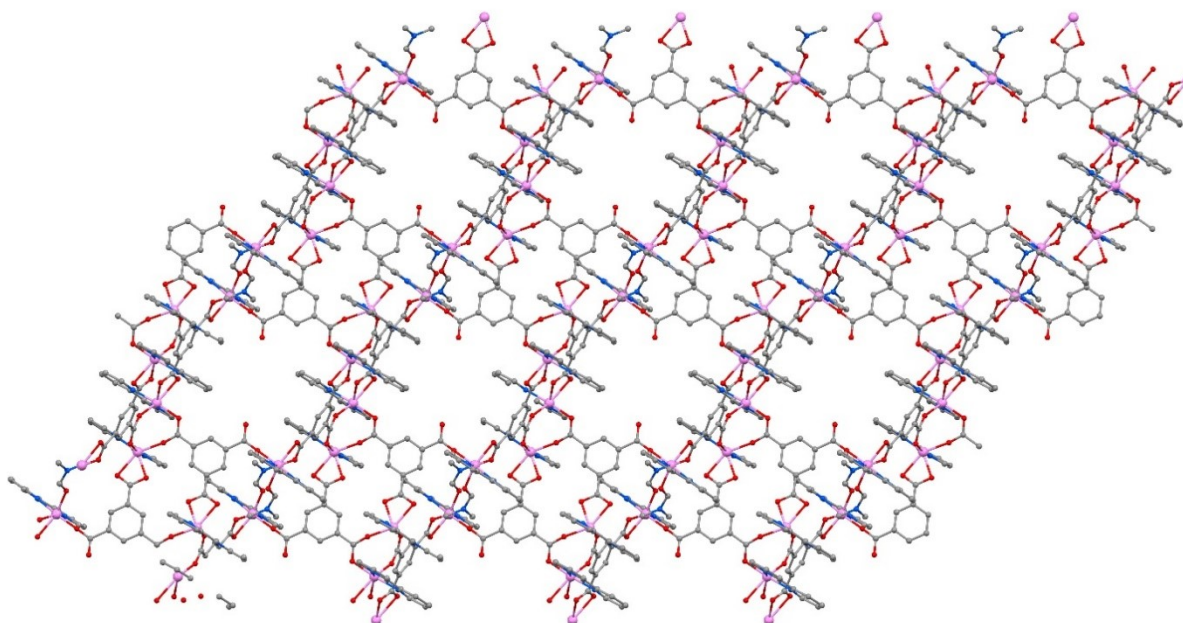

**Figure SI-1:** Two-dimensional coordination polymer structure of the catalyst, viewed approximately along 'a'-axis. The solvent accessible void volume can be seen. Lattice solvents – DMF and water are not shown for clarity.

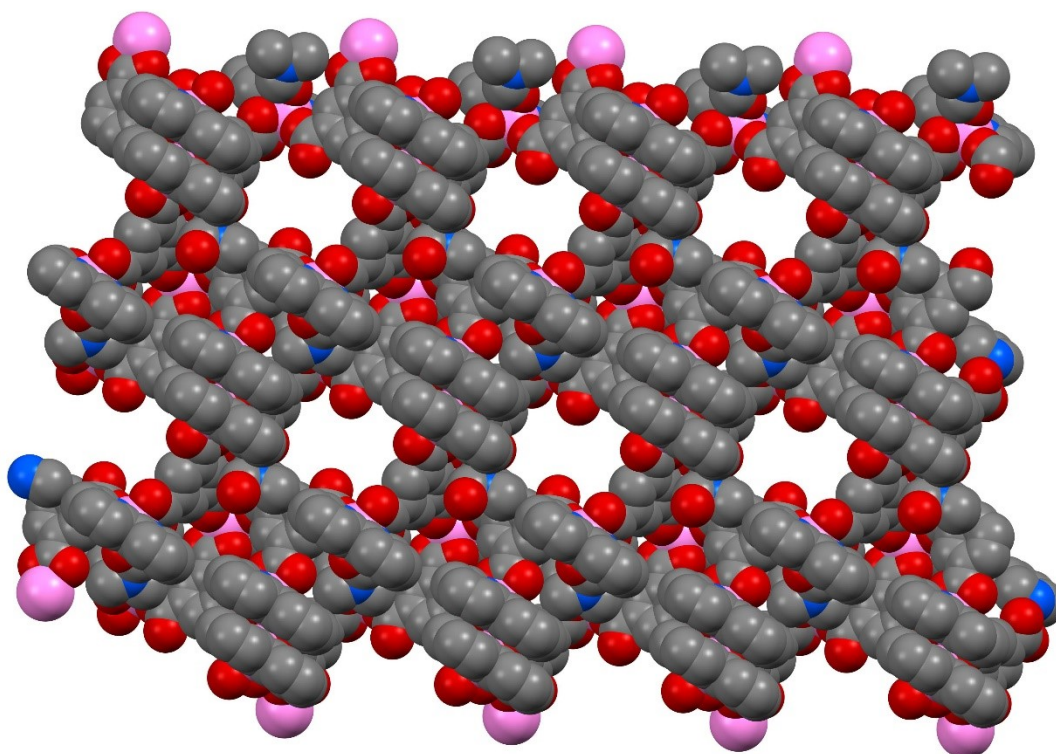

**Figure SI-2:** Two-dimensional coordination polymer structure of the catalyst. Solvent accessible void volume can be seen in the space filled model.

### **Analysis of PXRD**

Crystals of coordination polymer **Co-MOF-3a** was ground into powder on a mortar and the obtained powder sample was analyzed for its powder x-ray diffraction patterns. The experimentally obtained patterns were plotted against the simulated patterns. The powdered sample showed moderate crystallinity and it matched quite well with the simulated patterns. For testing the crystallinity of the used catalyst, we have recorded the PXRD pattern of the catalyst used for five cycles. It showed significant crystallinity.

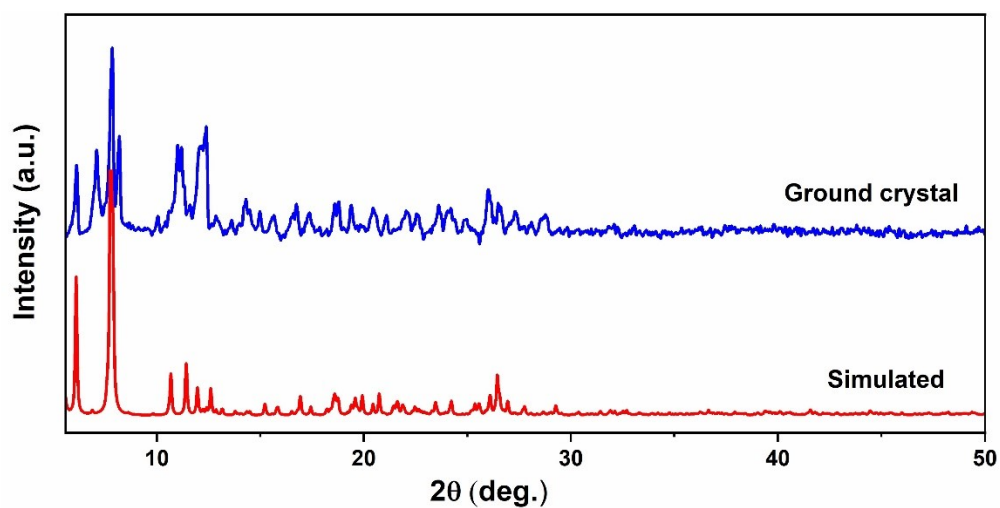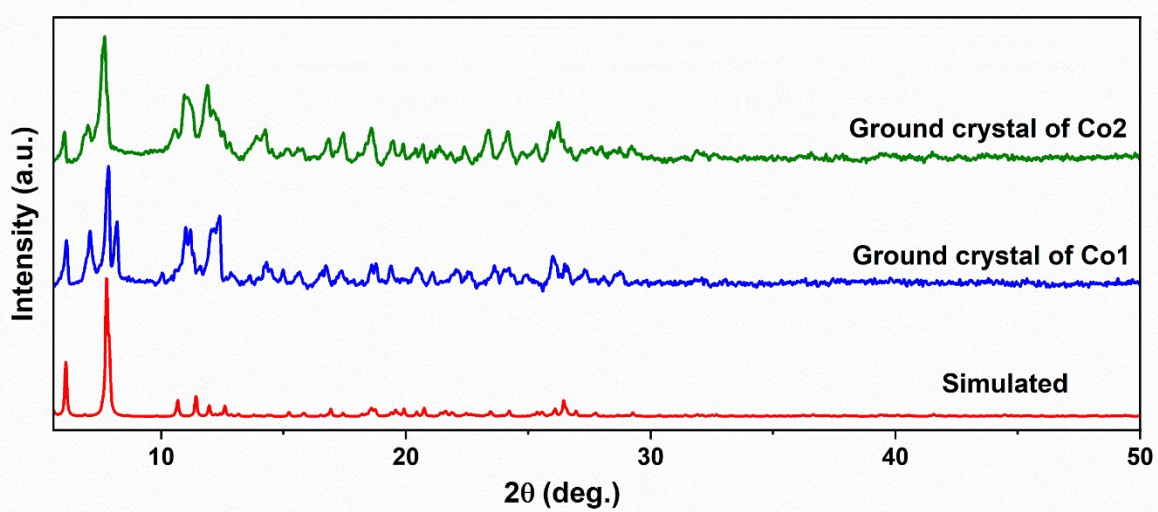

**Figure SI-3:** Simulated, experimentally observed PXRD patterns of **asynthesized Co-MOF-3a (Co-1)** and of the catalyst recovered after five cycles (**Co-2**) are shown..

### Computational Details:

The unit cell of the Co(btc)(bpy) MOF was used for our calculations. All computational calculations were performed utilizing the Vienna ab initio simulation package (VASP).<sup>1</sup> The calculations were rooted in spin-polarized density functional theory (DFT). They relied upon a plane-wave basis set augmented by the projector-augmented wave (PAW)<sup>2</sup> technique to describe electron-ion interactions accurately. Geometry optimization of the MOF structure employed the generalized gradient approximation (GGA)<sup>3</sup> functional, specifically the Perdew, Burke, and Ernzerhof (PBE)<sup>4</sup> exchange-correlation functional. Grimme's DFT D3BJ correction<sup>5</sup> was incorporated to account for dispersion forces, enhancing the accuracy of the results. The optimized geometry, illustrating the most stable arrangement of atoms, is represented in **Figure SI-4**. The energy and force convergence standards were established at  $1 \times 10^{-6}$  eV per unit cell and  $1 \times 10^{-2}$  eV per Å. The energy cutoff for plane-wave expansion was set at 520 eV, ensuring a comprehensive treatment of the electronic structure. The Brillouin zone was efficiently sampled using the  $\Gamma$ -centered k-grid scheme with a  $4 \times 4 \times 4$  k-mesh, providing a suitable level of accuracy in reciprocal space. After optimization, the cell parameters and structural characteristics of the MOF were documented in **Tables SI(i) to SI(iii)**, along with atom type labels corresponding to **Figure SI5**. These tables provide comprehensive details of the final configuration of the MOF.



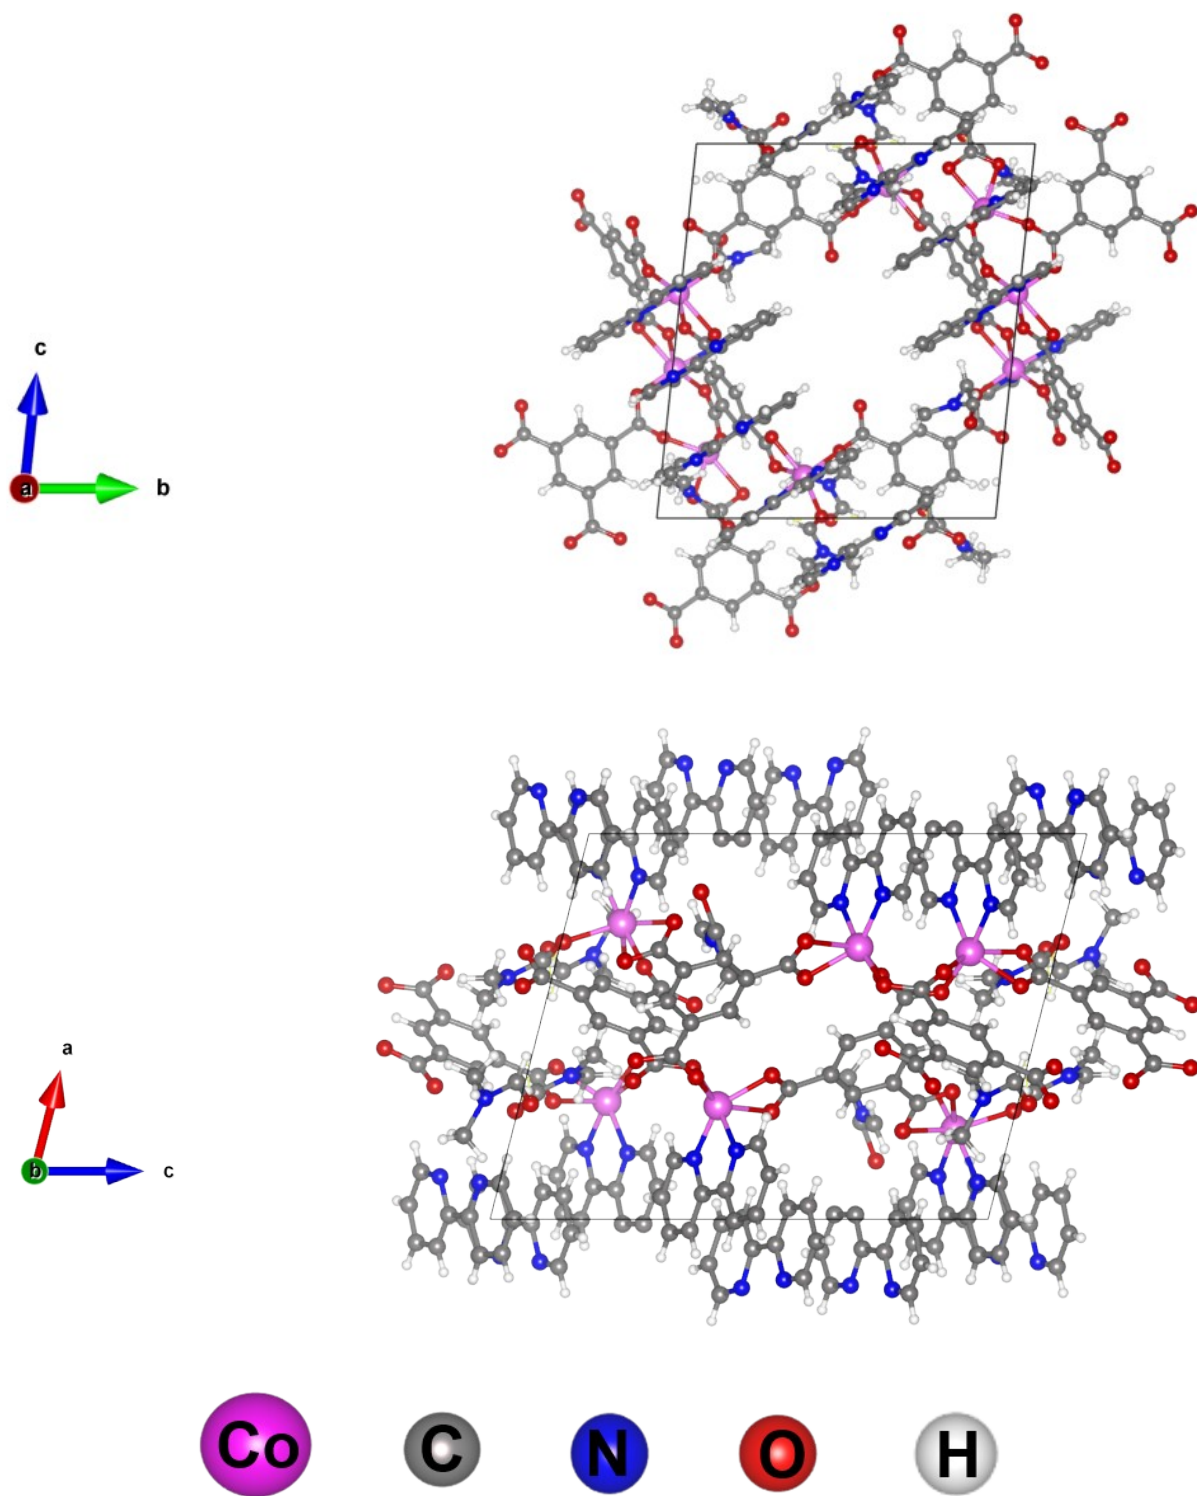

Figure SI-4. Optimized structure of MOF.

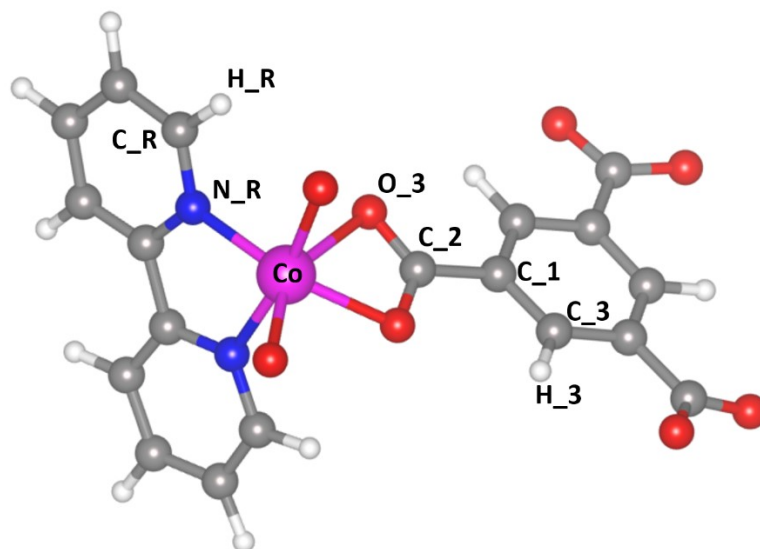

**Figure SI-5.** Atom-labelled unit of the MOF framework.

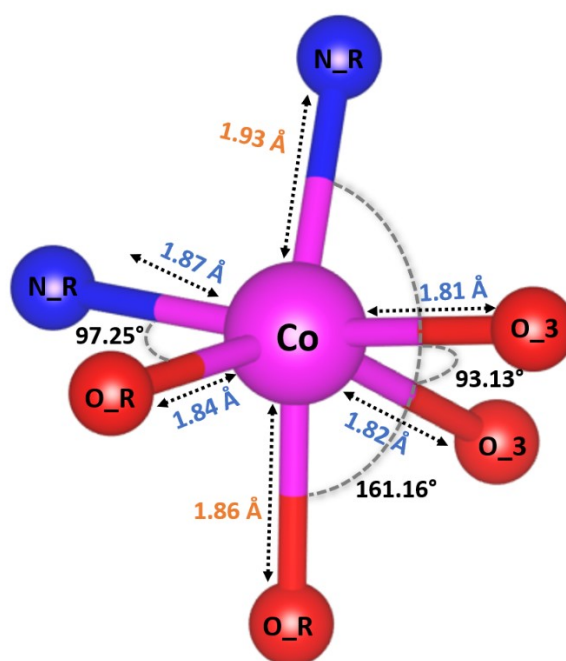

**Figure SI-6:** Coordination Alignment of metal Center (Co) with its bonded Atoms.



**Table SI(i).** MOF cell parameters taken from DFT optimization.

| MOF | Lattice Size (Å) |       |       | Angle (°) |         |          | Cell Volume (Å <sup>3</sup> ) |
|-----|------------------|-------|-------|-----------|---------|----------|-------------------------------|
|     | a                | b     | c     | $\alpha$  | $\beta$ | $\gamma$ |                               |
|     | 14.20            | 15.59 | 16.95 | 78.36     | 72.54   | 68.94    | 3324.63                       |

**Table SI(ii).** Average Bonding Parameters of the MOF.**Bonds**

| a1  | a2  | Bond Length (Å) |
|-----|-----|-----------------|
| Co  | O_R | 1.85            |
| Co  | O_3 | 1.82            |
| Co  | N_R | 1.90            |
| C_R | C_R | 1.46            |
| C_R | H_R | 1.08            |
| C_R | N_R | 1.34            |
| C_2 | O_3 | 1.36            |
| C_3 | H_3 | 1.10            |
| C_1 | C_2 | 1.51            |
| C_1 | C_3 | 1.40            |

**Table SI(iii).** Average Bending Parameters for MOF.**Angles**

| a1  | a2  | a3  | Angle (°) |
|-----|-----|-----|-----------|
| Co  | O_R | O_R | 145.9     |
| Co  | O_3 | O_R | 148.4     |
| Co  | N_R | O_R | 154.5     |
| C_R | C_R | C_R | 111.3     |
| C_R | C_R | H_R | 107.2     |
| C_R | N_R | C_R | 120.0     |
| C_R | C_R | N_R | 153.7     |
| C_2 | O_3 | Co  | 88.80     |
| O_3 | C_2 | C_1 | 129.9     |
| C_1 | C_3 | H_3 | 119.8     |
| C_3 | C_1 | C_2 | 120.1     |
| C_3 | C_1 | C_3 | 120.0     |

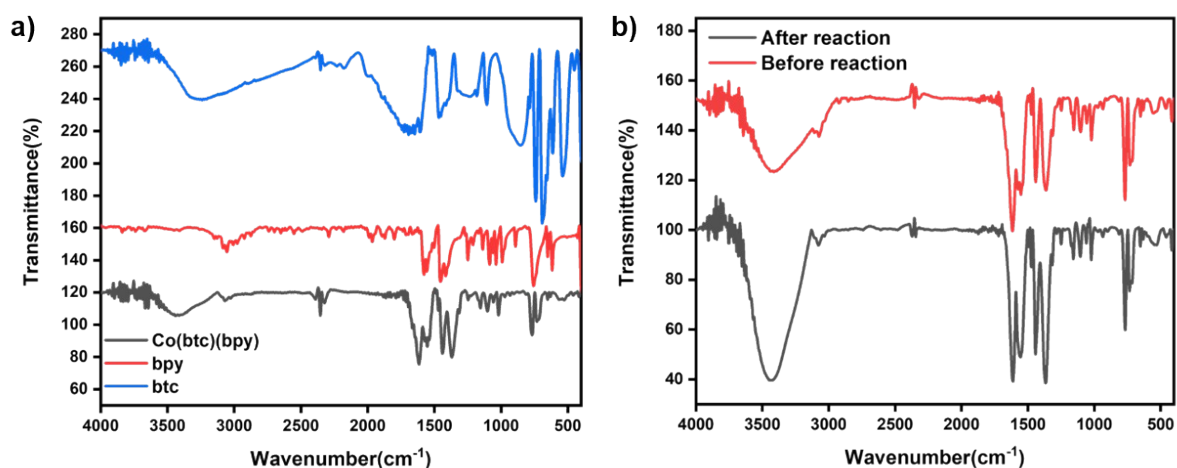

**Fig SI-7.** FTIR spectra of **a)** Co(btc)(bpy), btc and 2,2'-bpy **b)** reused catalyst after 5 cycles

Fig 7a shows the stacked FTIR spectra of btc, bpy and MOF-3a, a broad peak in 3400-3500 cm<sup>-1</sup> shows the stretching vibration of hydroxyl groups.<sup>6</sup> The peak at 3100 shows the stretching frequency of sp<sup>2</sup> hybridized C-H while the stretching and bending vibrations of C=C in benzene tricarboxylic acid and 2,2'-bipyridine appear at 1450-1600 cm<sup>-1</sup> and 650-900 cm<sup>-1</sup>, respectively. The stretching frequency of C=O has shifted to 1620 cm<sup>-1</sup> due to the coordination of oxygen to cobalt, which lowers the frequency as the strength of C=O bond in the carbonyl decreases.<sup>7</sup> Fig 7b shows the IR spectra of reused catalyst after 5 cycles and it is observed that there is no change in FTIR absorption pattern

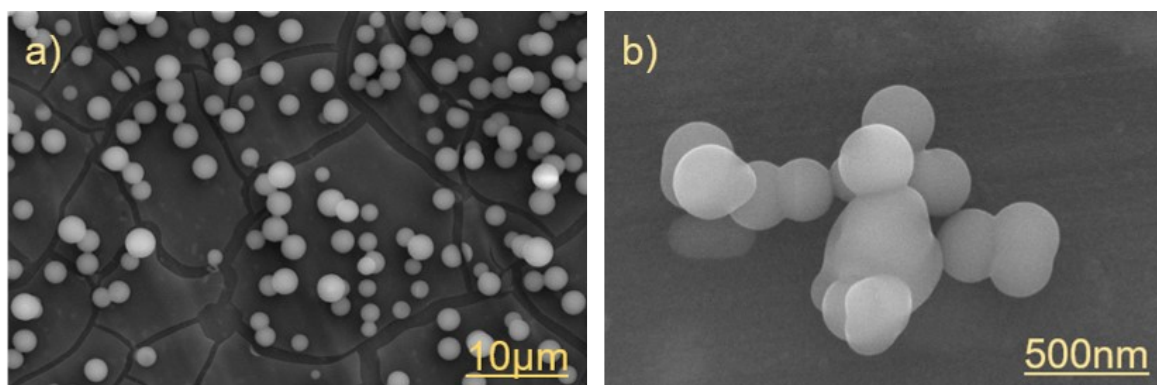

**Fig SI-8.** SEM images **(a)** and **(b)** of reused Co(btc)(bpy) catalyst after 5 cycles

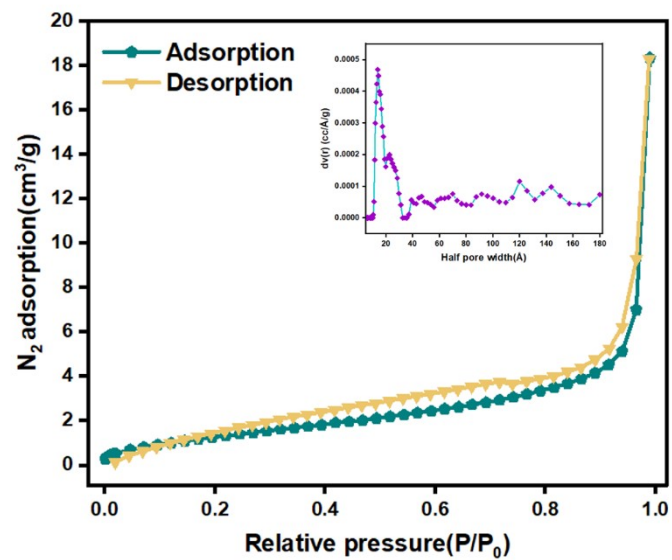

**Fig SI-9:** BET N<sub>2</sub> adsorption of Co-MOF-3a after 5 cycles

# Acetophenone (2a)

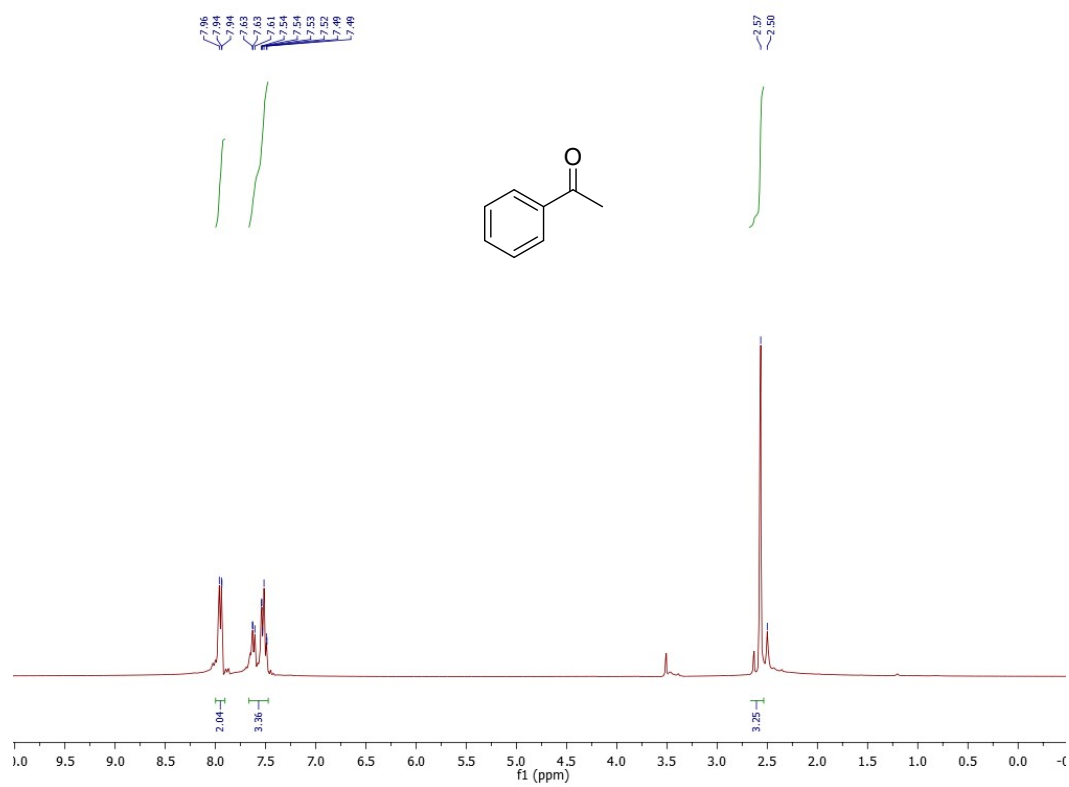

<sup>1</sup>H NMR spectrum of 2a

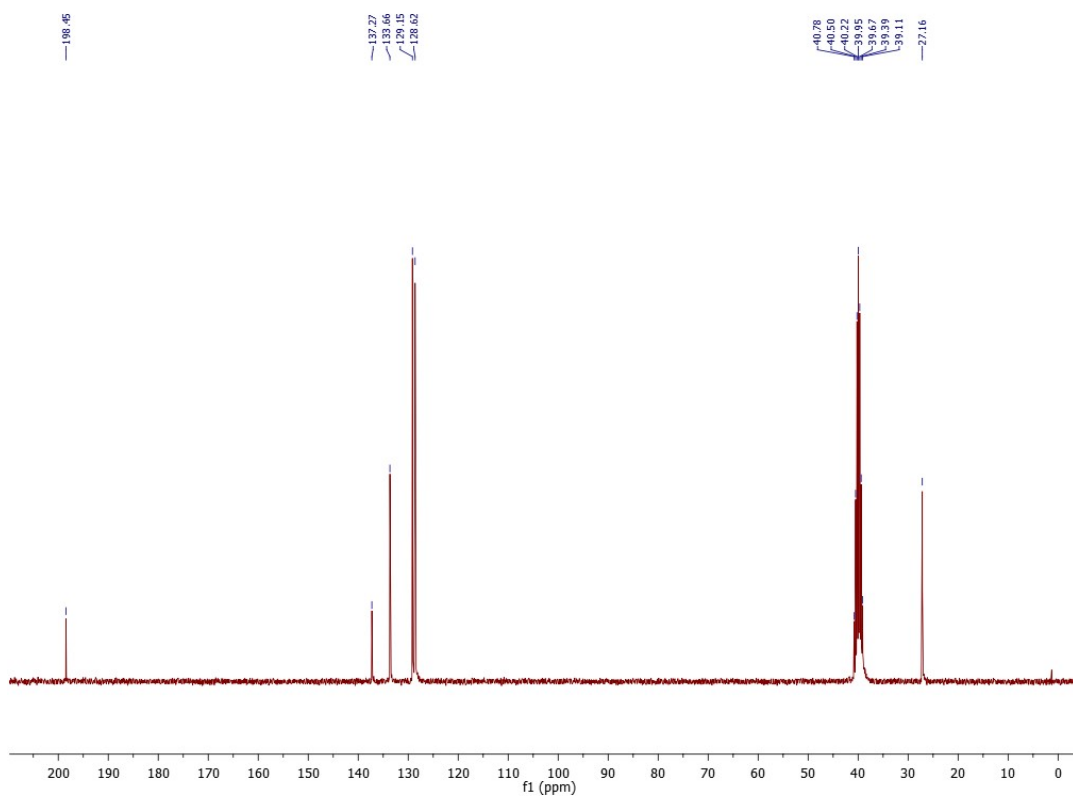

<sup>13</sup>C NMR spectrum of 2a

### 4-Methoxy acetophenone (2b)

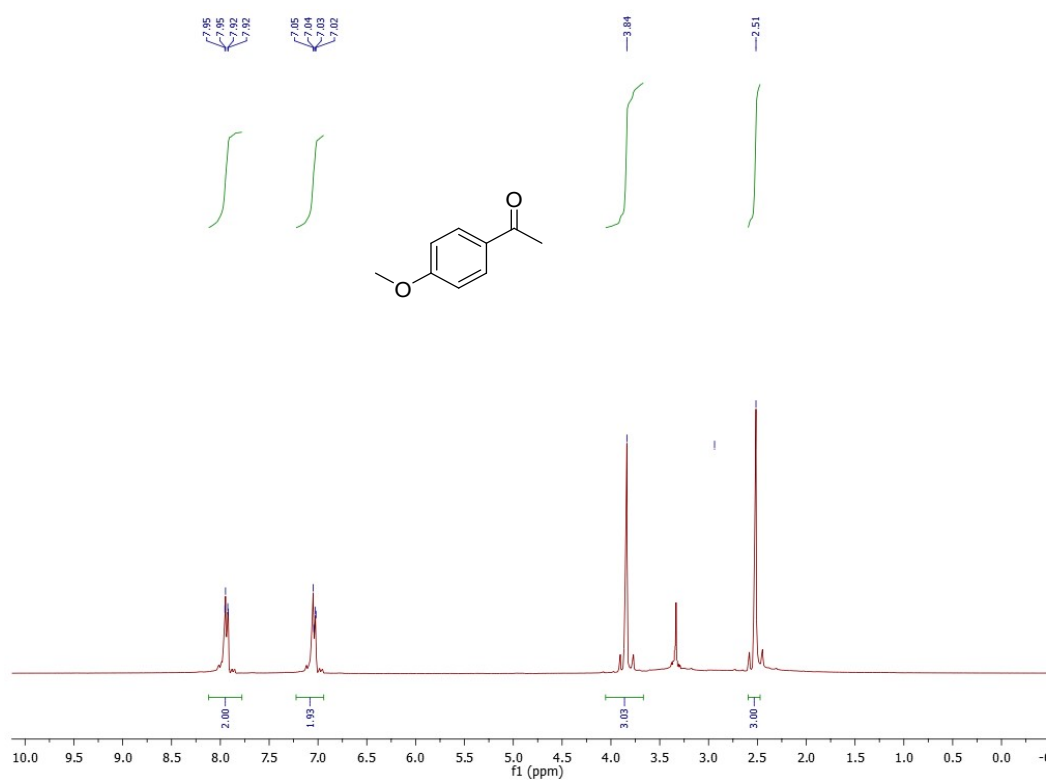

<sup>1</sup>H NMR spectrum of 2b

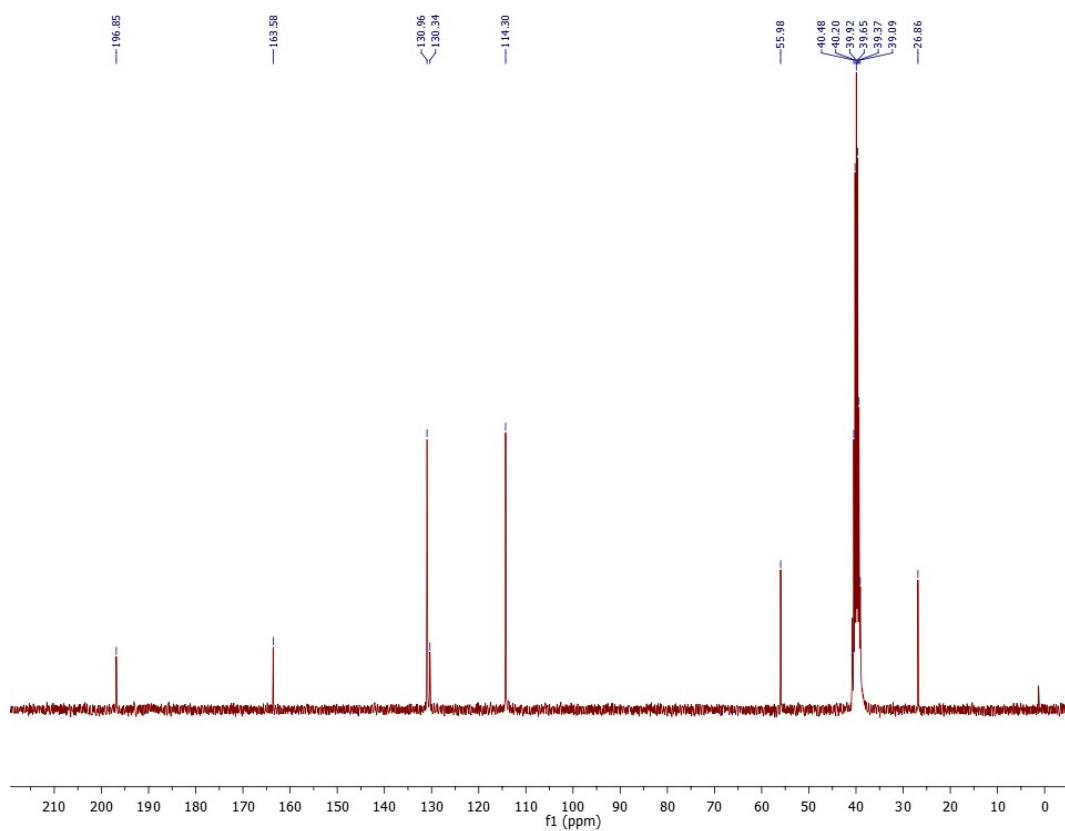

<sup>13</sup>C NMR spectrum of 2b

### 1-Acetyl naphthalene(2c)

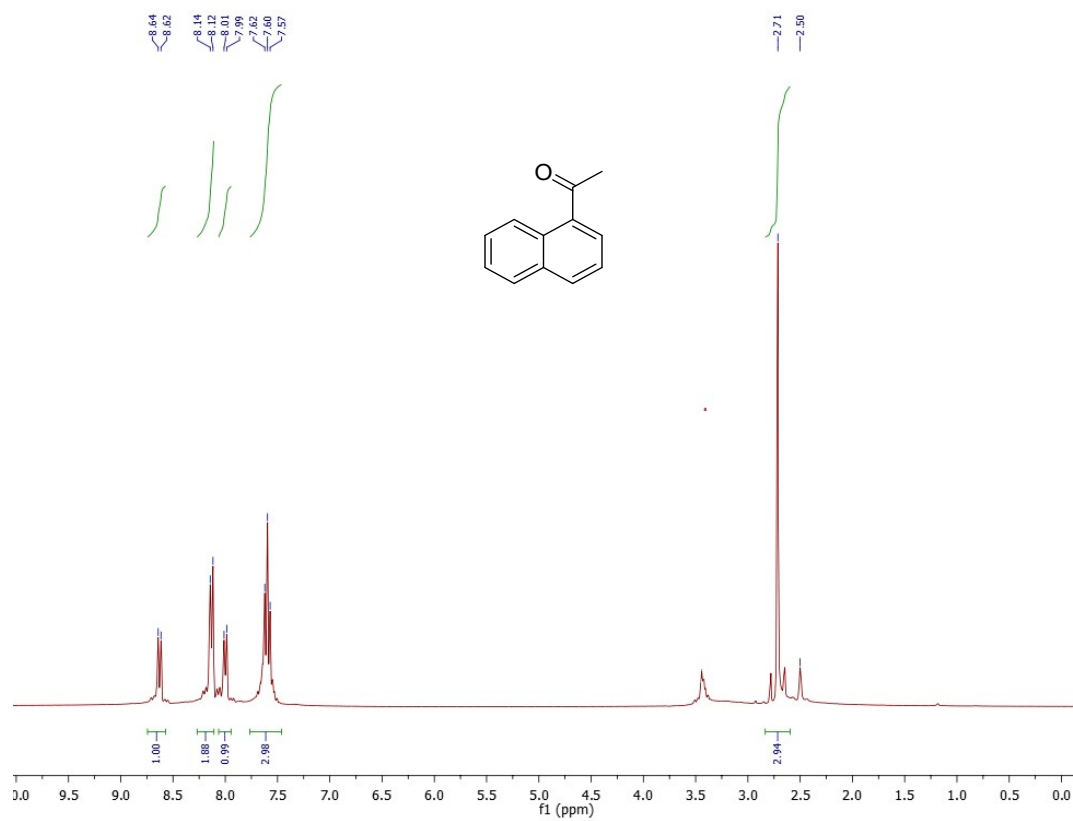

<sup>1</sup>H NMR spectrum of 2c

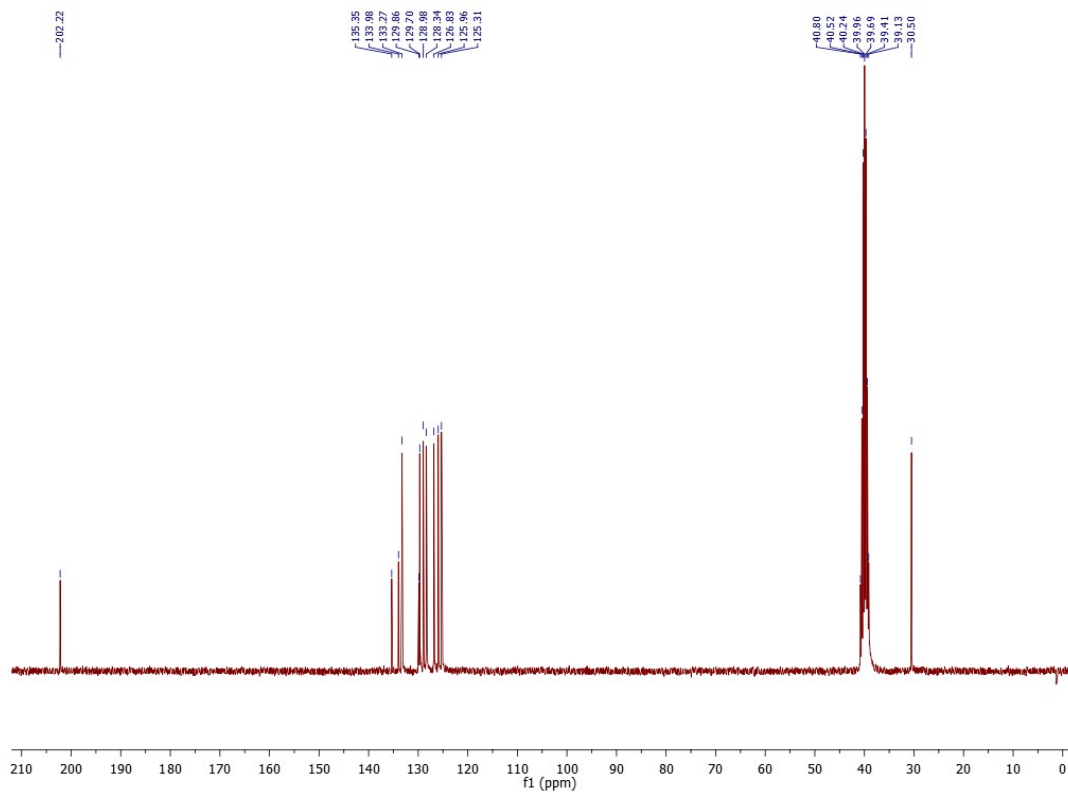

<sup>13</sup>C NMR spectrum of 2c



## 2-Acetyl naphthalene(2d)

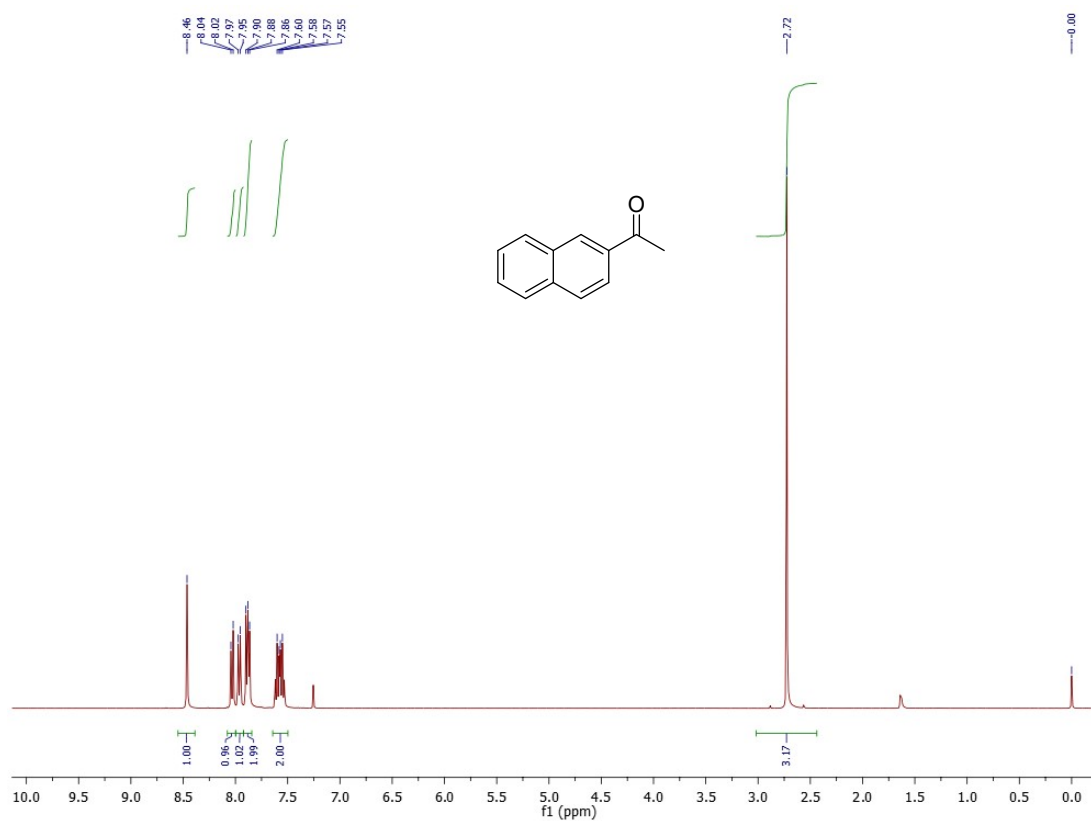

<sup>1</sup>H NMR spectrum of 2d

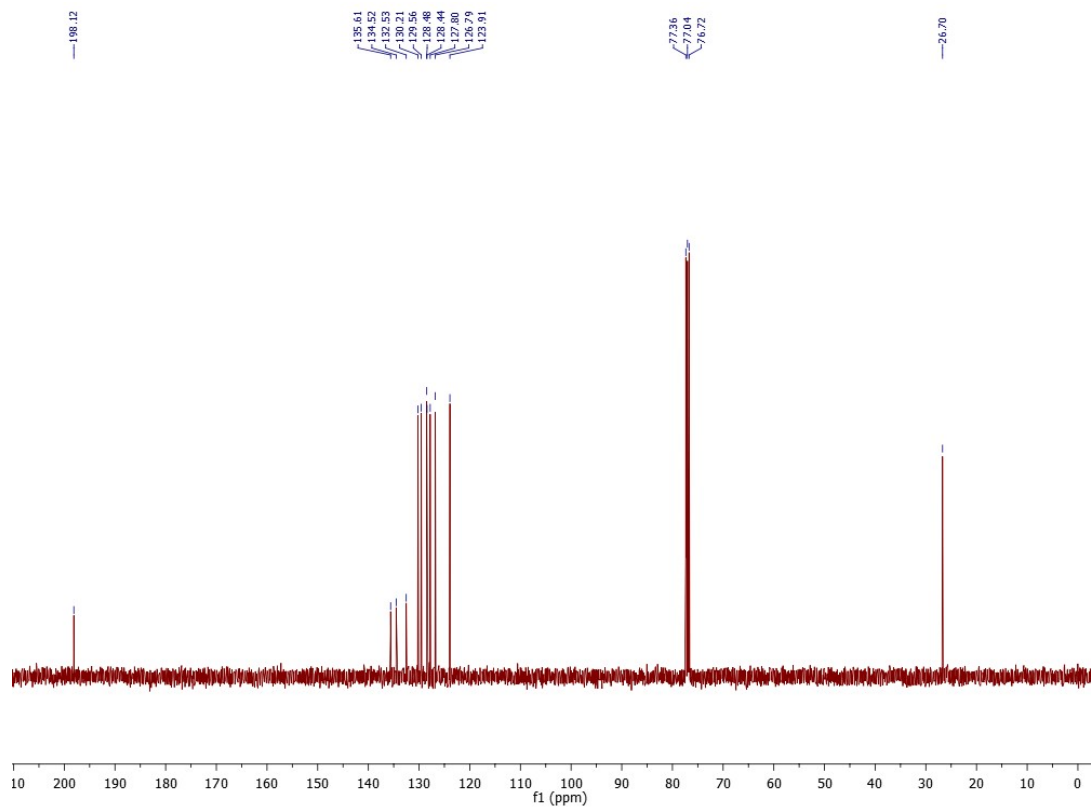

<sup>13</sup>C NMR spectrum of 2d

### 4-Bromo acetophenone (2e)

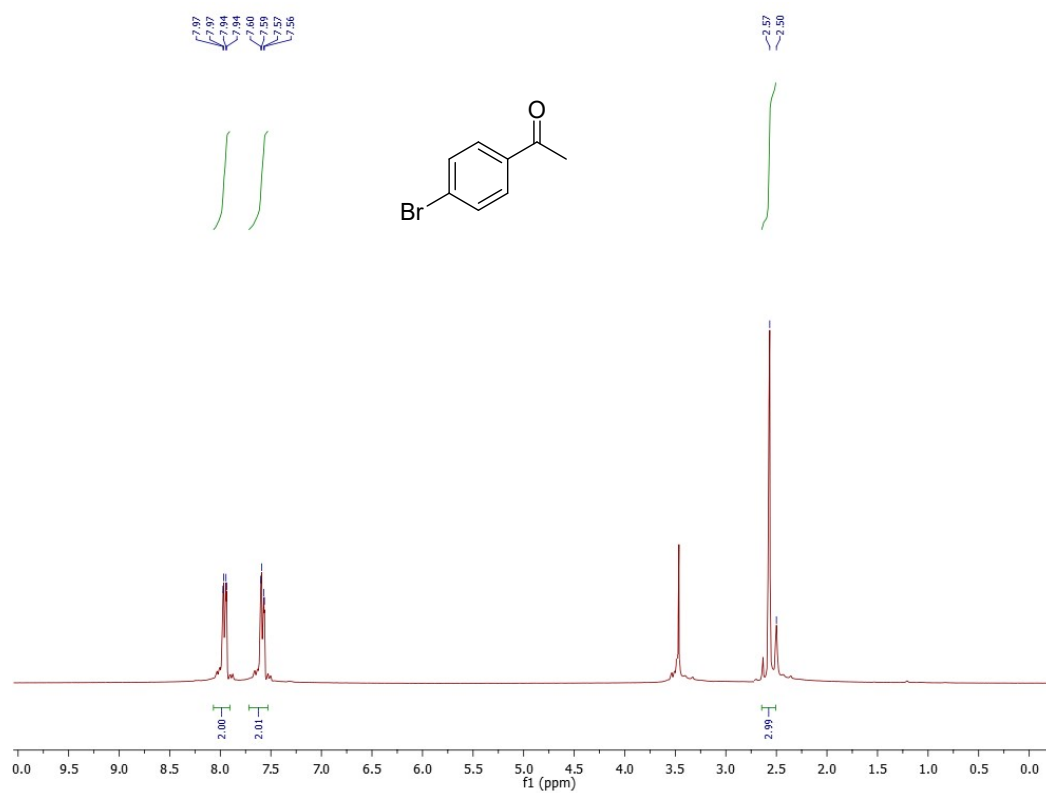

<sup>1</sup>H NMR spectrum of 2e

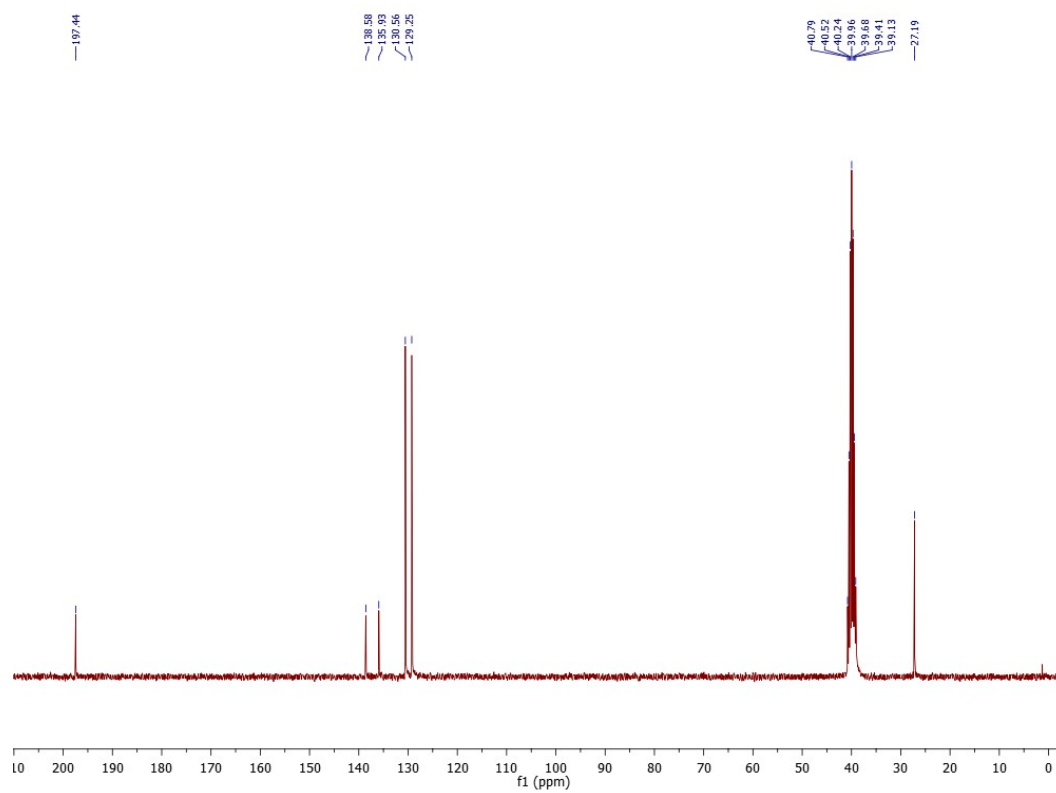

<sup>13</sup>C NMR spectrum of 2e

### 3-Nitro acetophenone(2f)

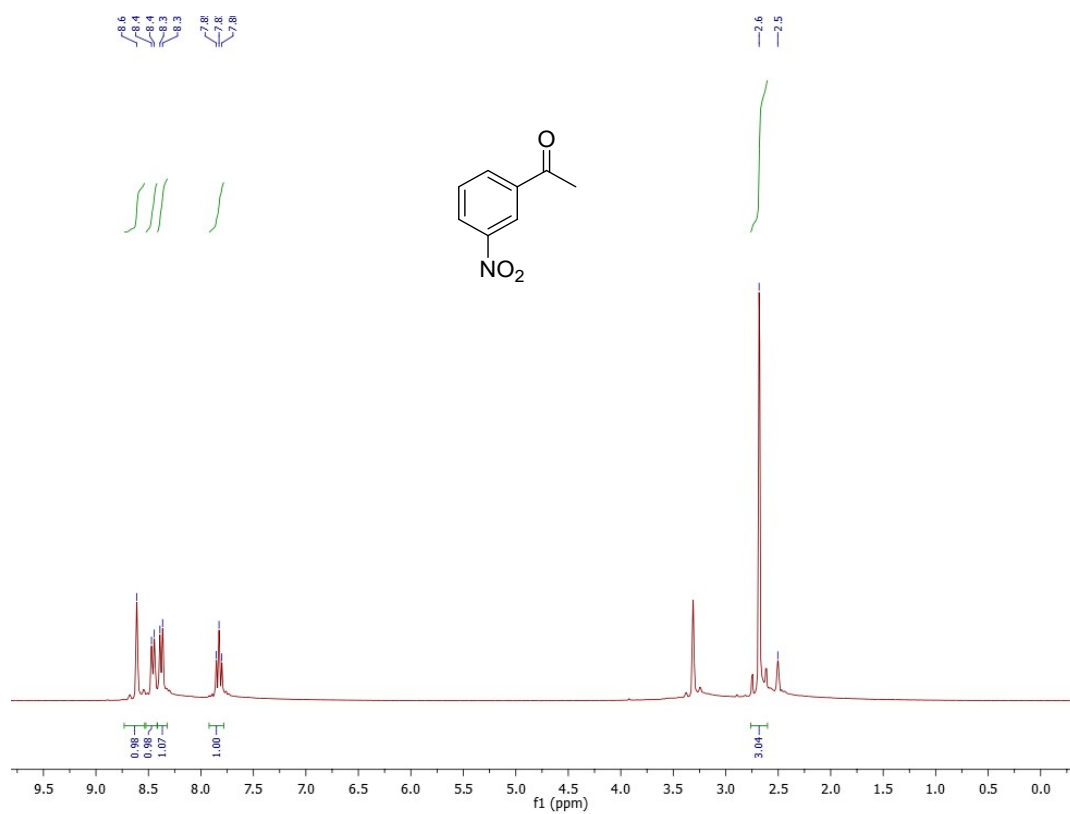

<sup>1</sup>H NMR spectrum of 2f

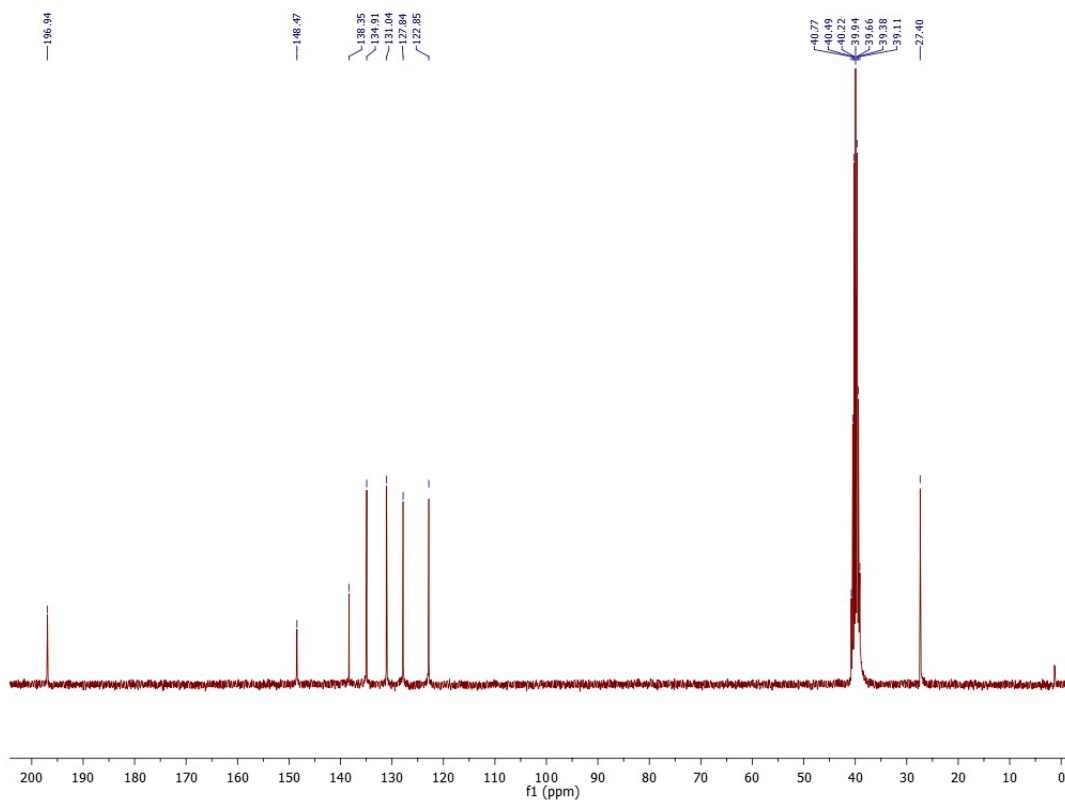

<sup>13</sup>C NMR spectrum of 2f

### 4-Trifluoroethylphenone (2g)

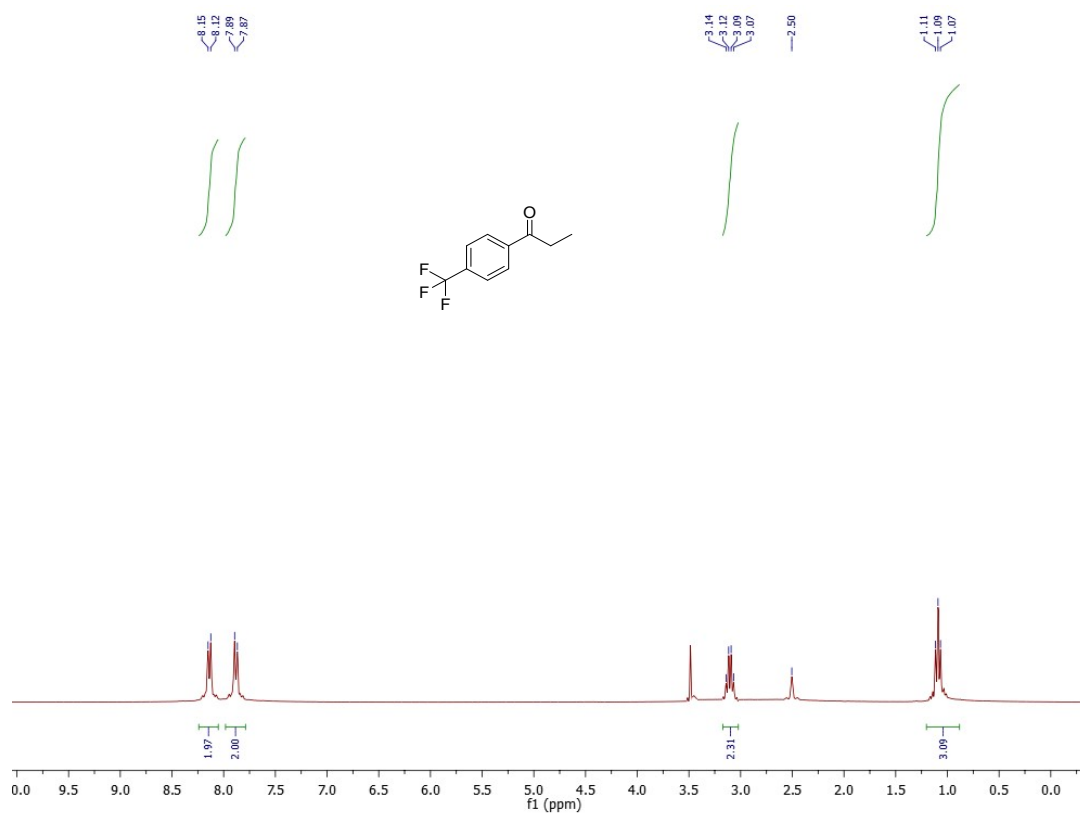

<sup>1</sup>H NMR spectrum of 2g

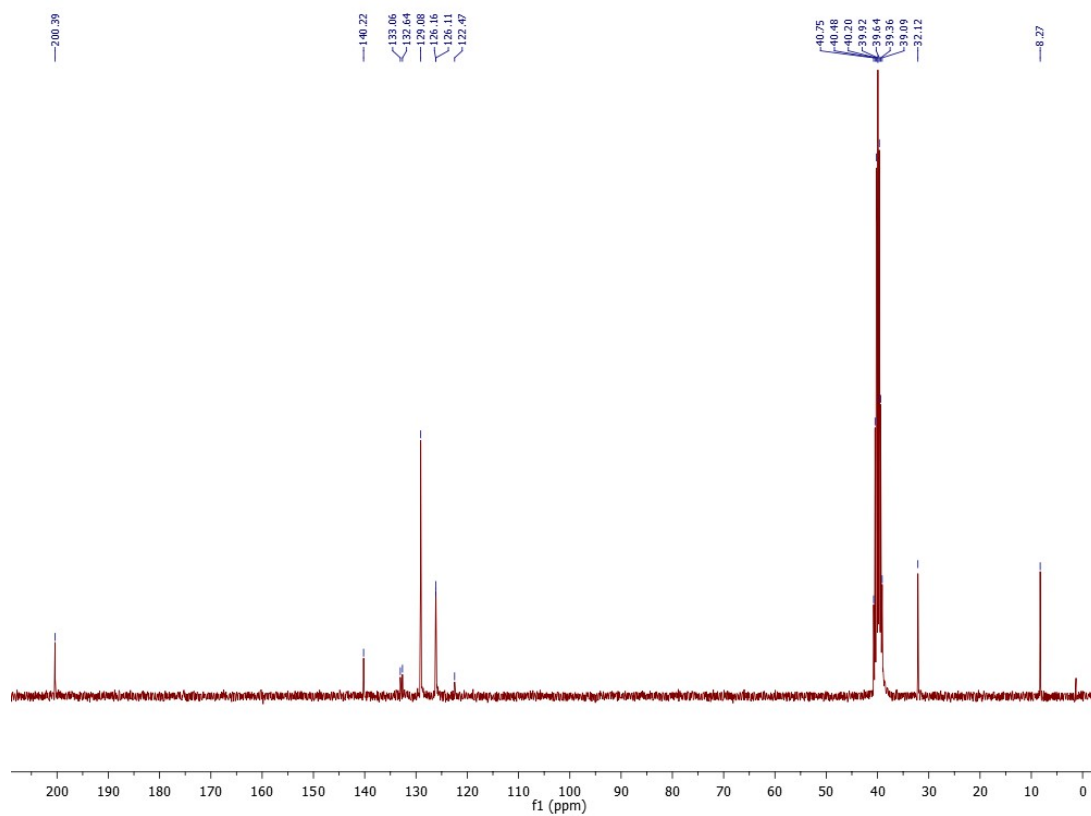

<sup>13</sup>C NMR spectrum of 2g

### 4-Bromo pyridyl methyl ketone (2h)

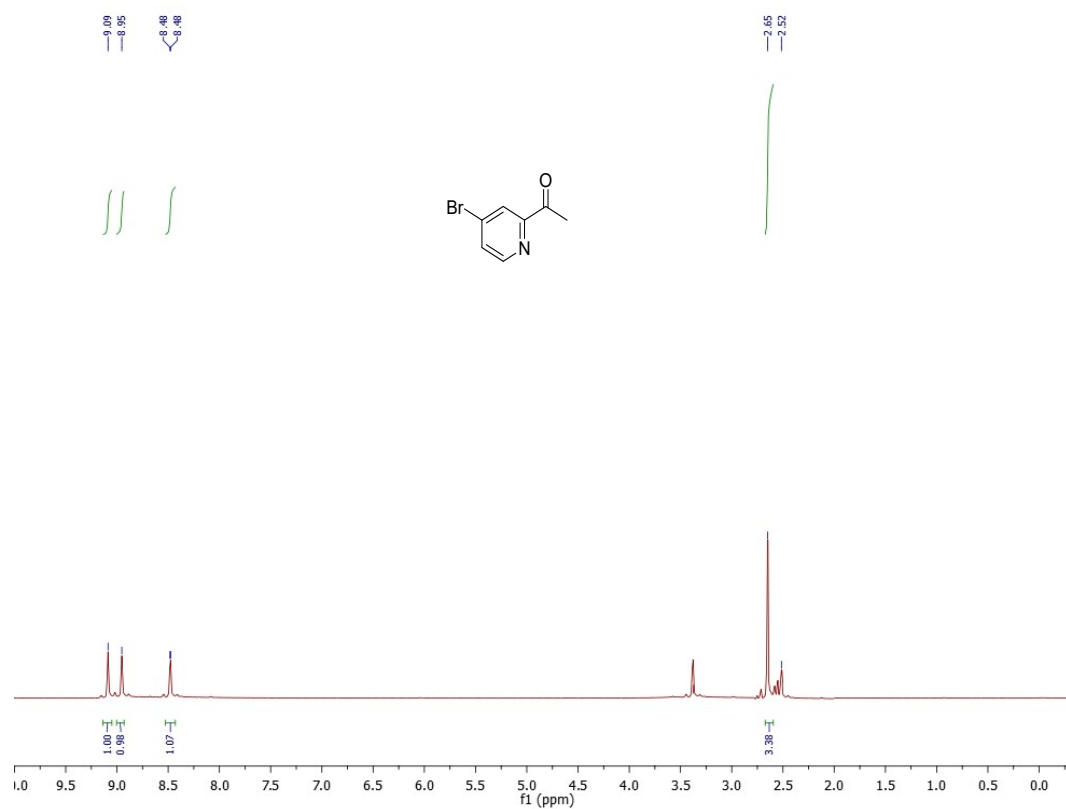

<sup>1</sup>H NMR spectrum of **2h**

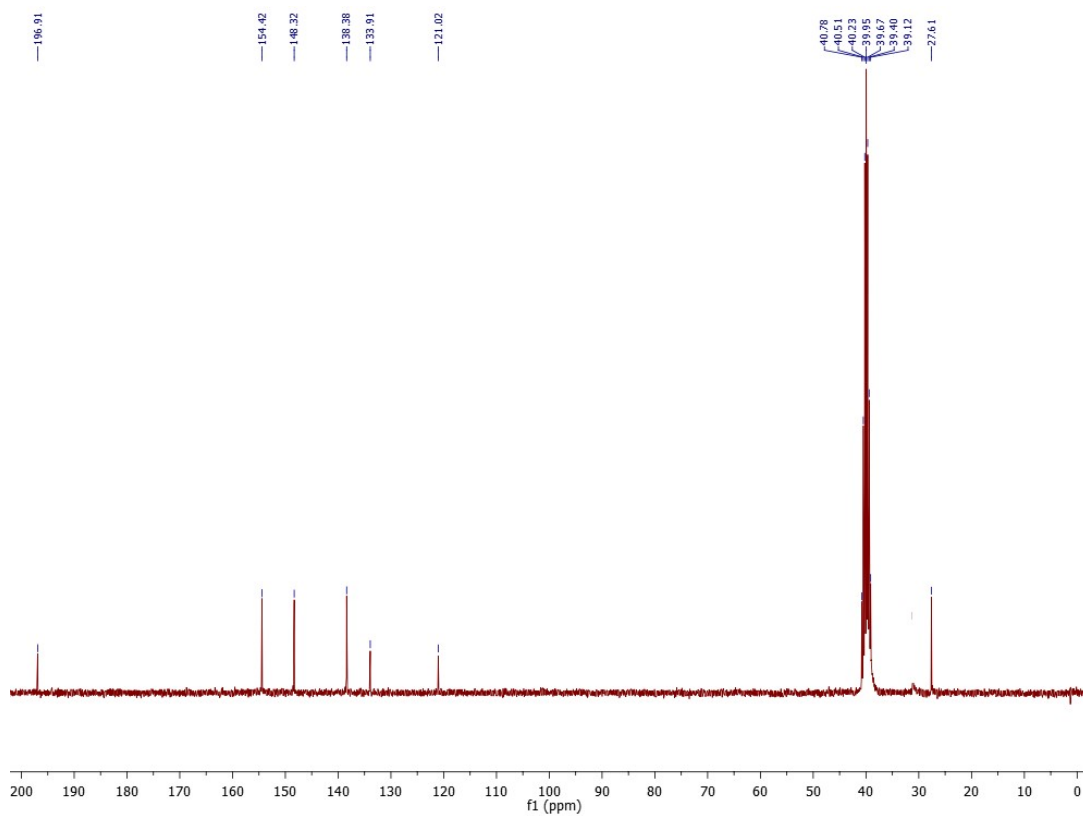

<sup>13</sup>C NMR spectrum of **2h**

# Benzophenone (2i)

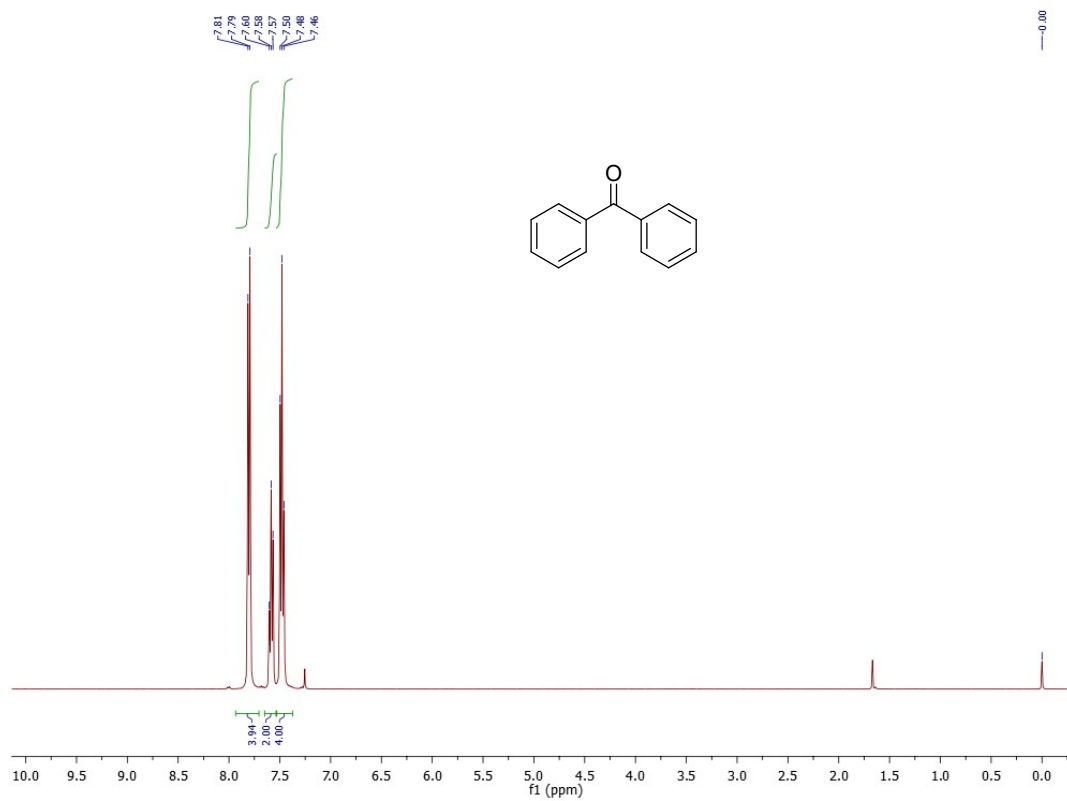

<sup>1</sup>H NMR spectrum of 2i

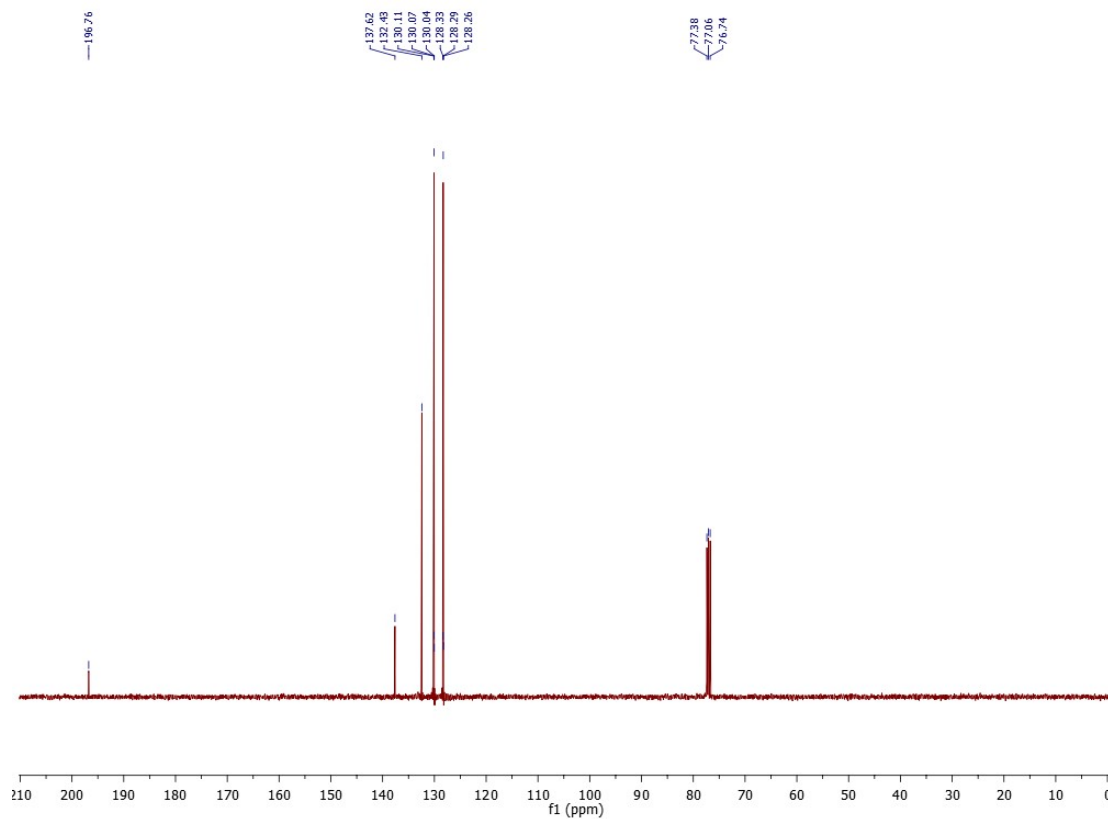

<sup>13</sup>C NMR spectrum of 2i



### 4-Chlorobenzophenone(2j)

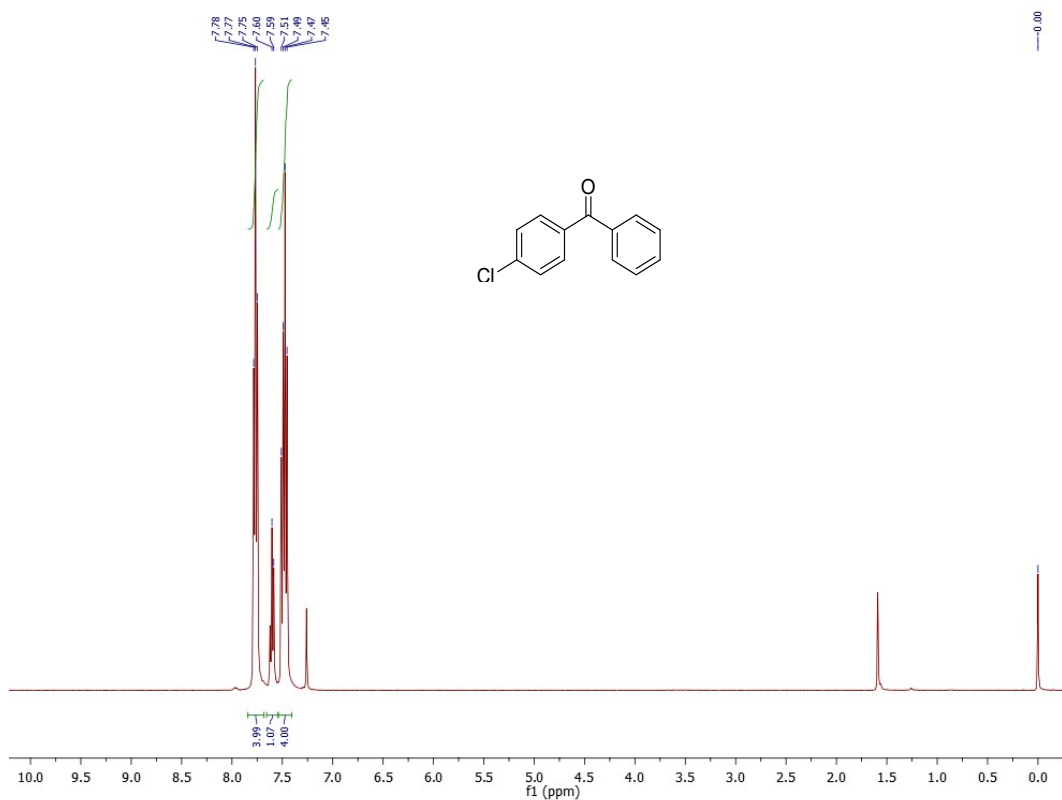

<sup>1</sup>H NMR spectrum of 2j

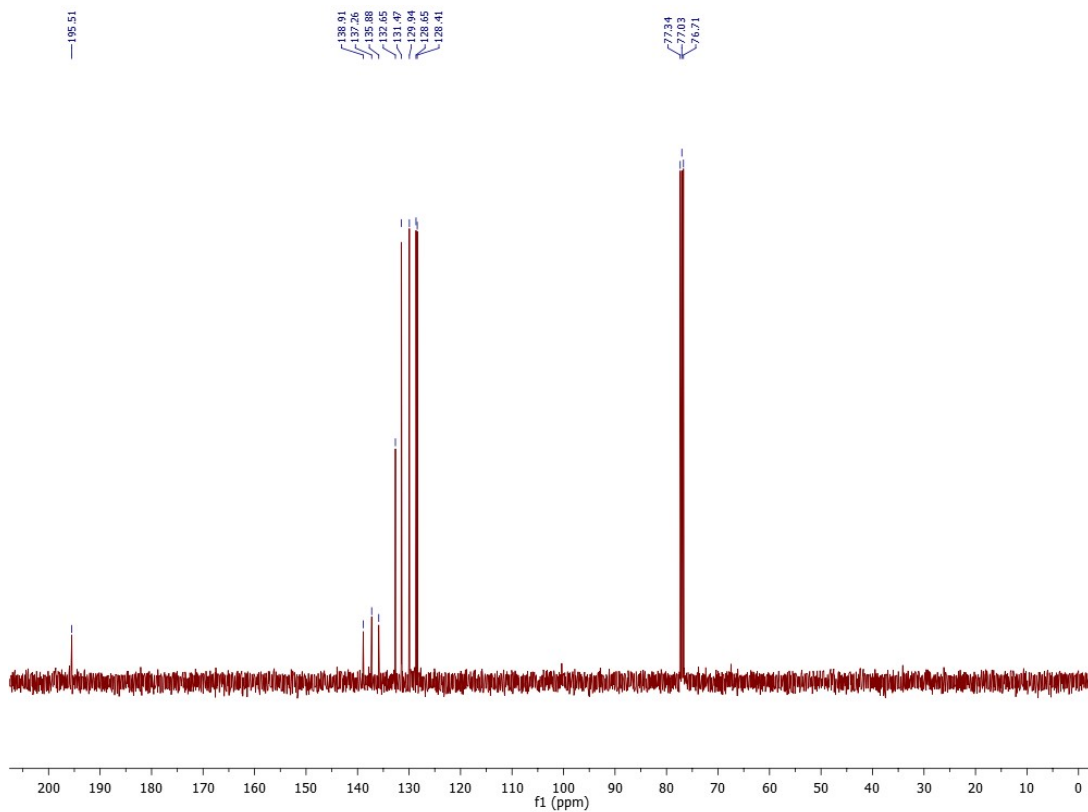

<sup>13</sup>C NMR spectrum of 2j

# Dibenzosuberone (2k)

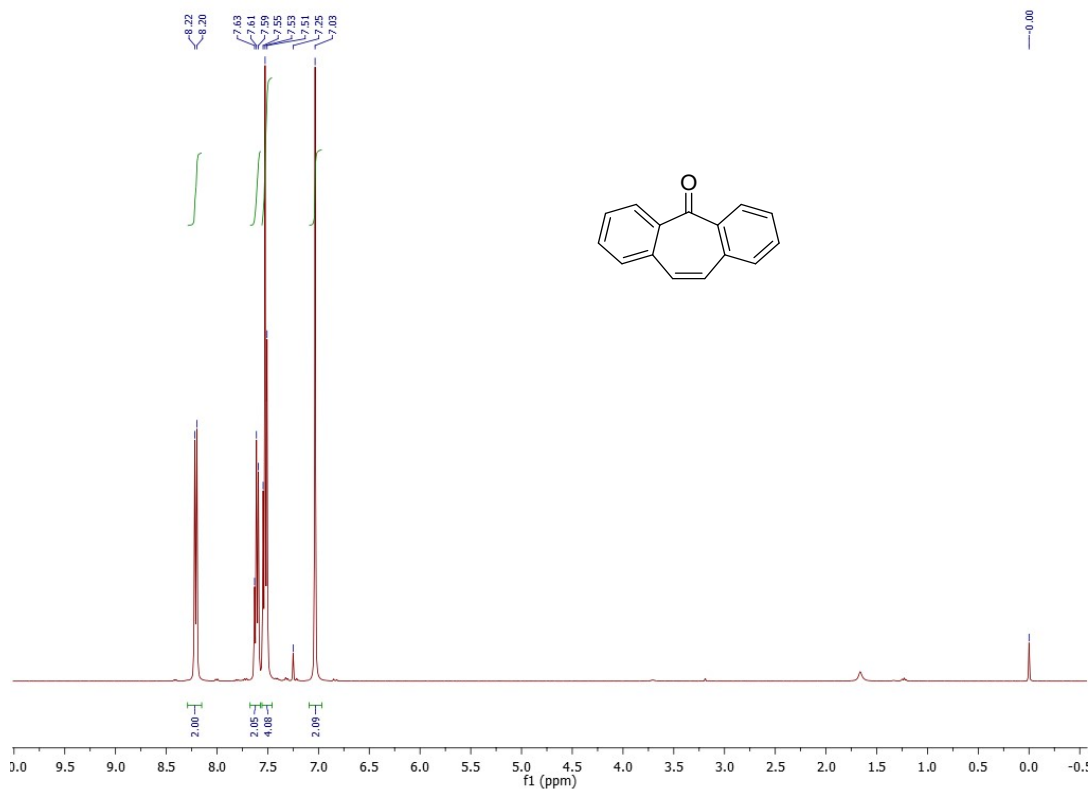

<sup>1</sup>H NMR spectrum of 2k

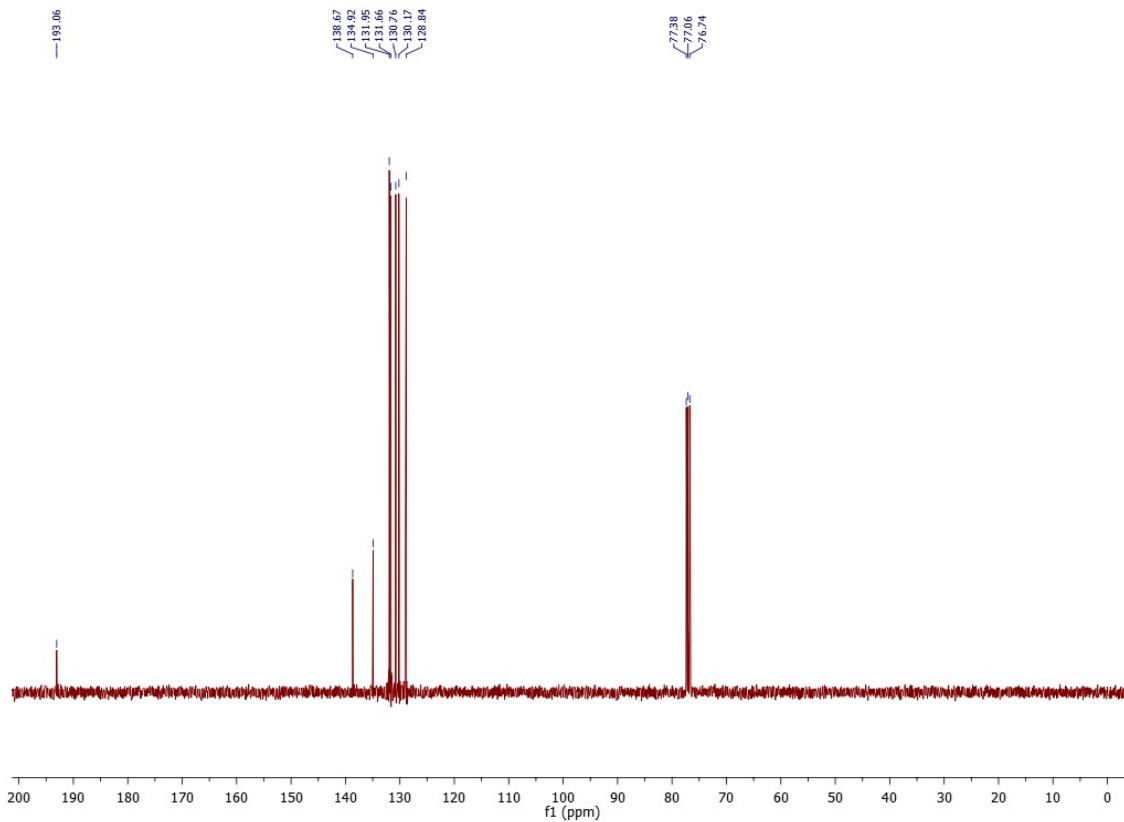

<sup>13</sup>C NMR spectrum of 2k

# Pyridyl acetophenone (21)

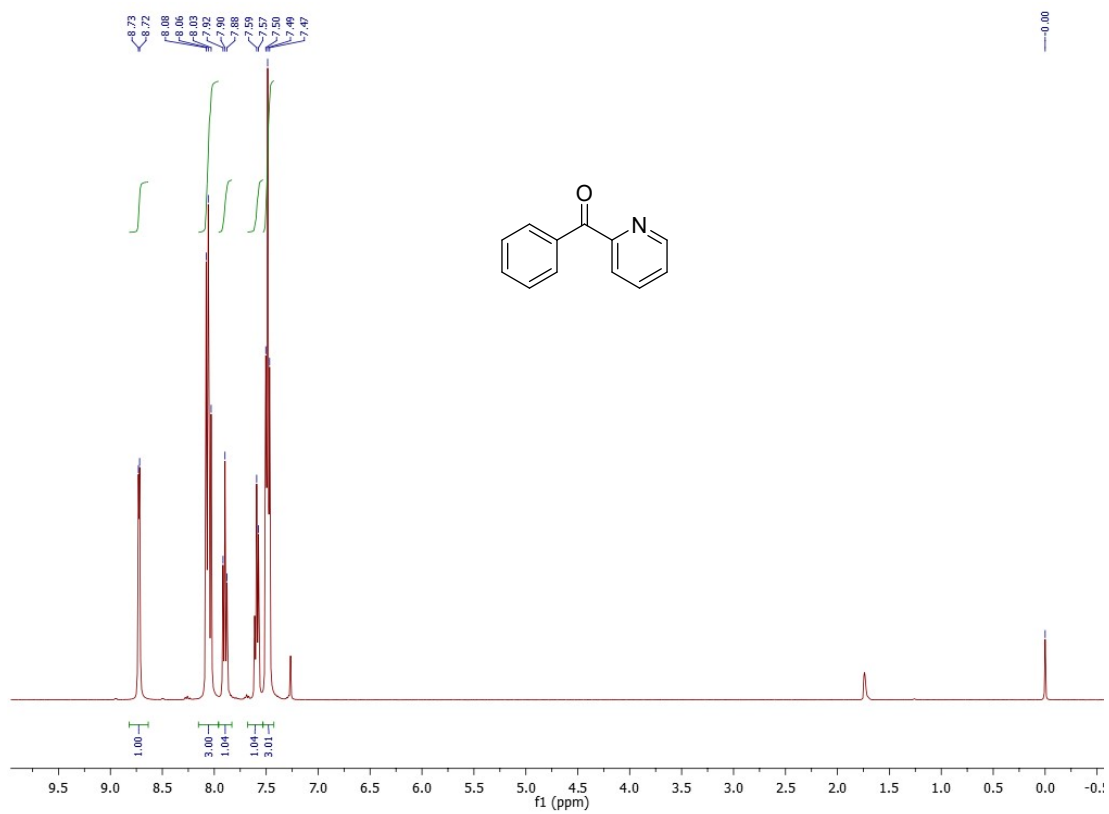

<sup>1</sup>H NMR spectrum of 21

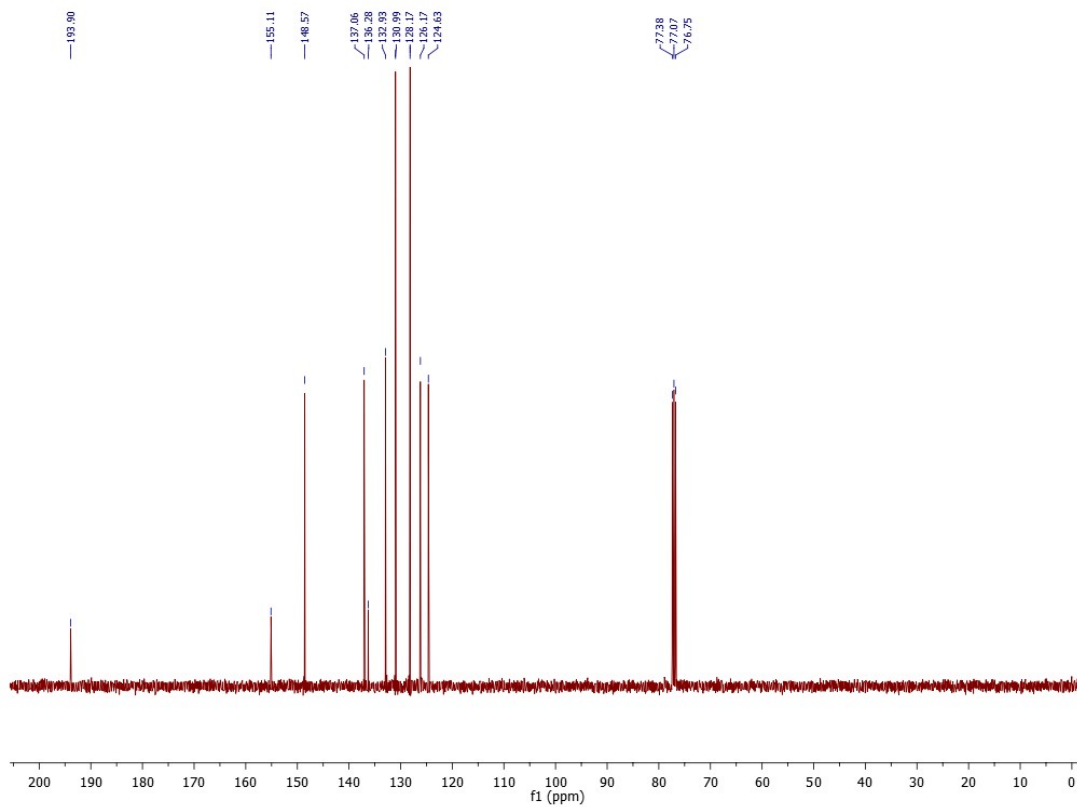

<sup>13</sup>C NMR spectrum of 21

# Chromone (2m)

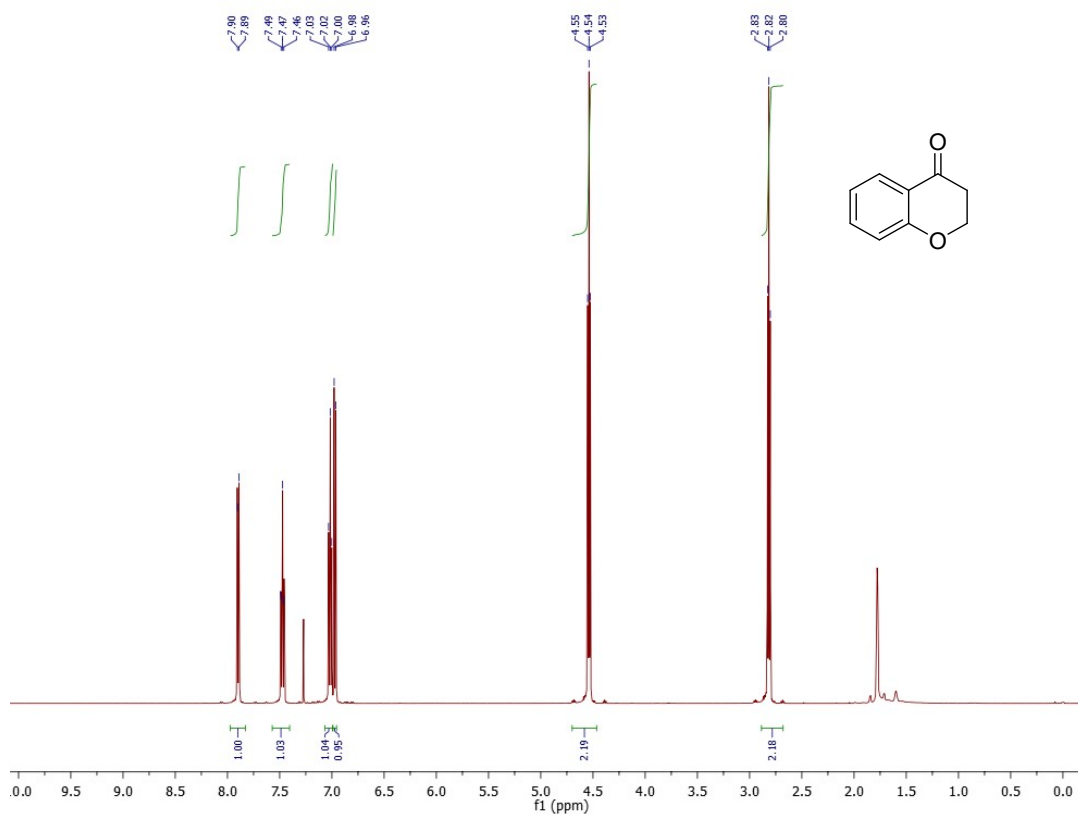

<sup>1</sup>H NMR spectrum of **2m**

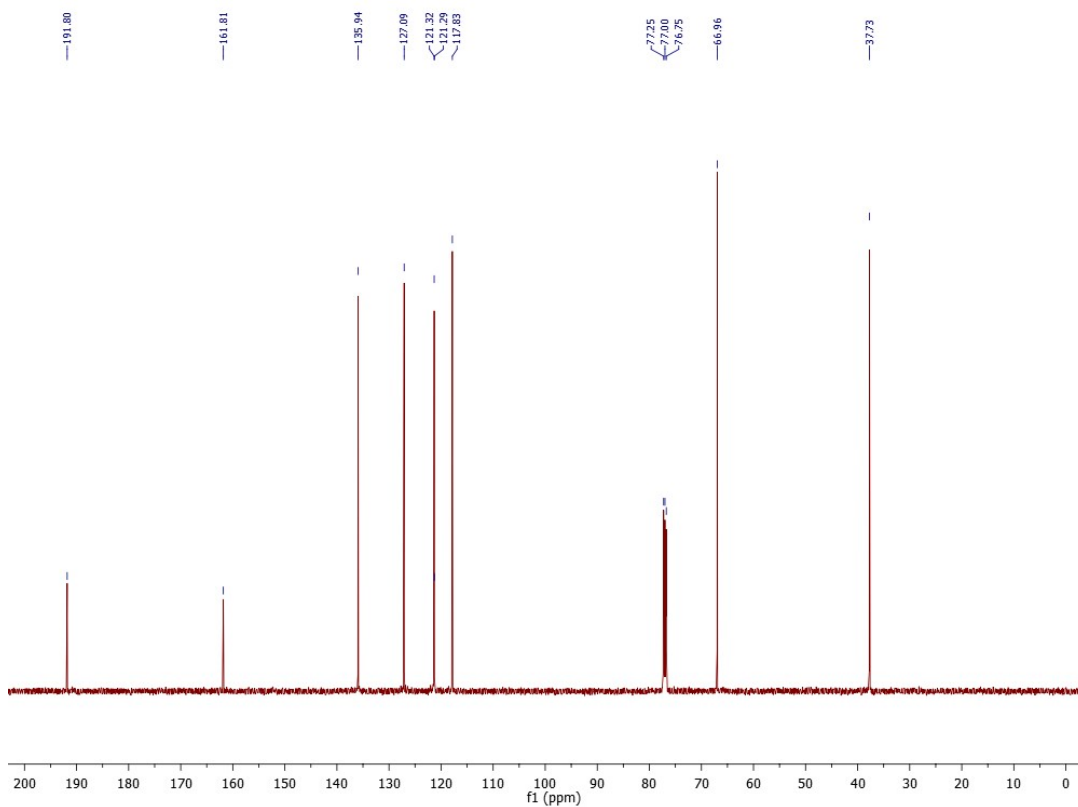

<sup>13</sup>C NMR spectrum of **2m**

## 2-Phenyl-1H-benzo[d]imidazole (6a)

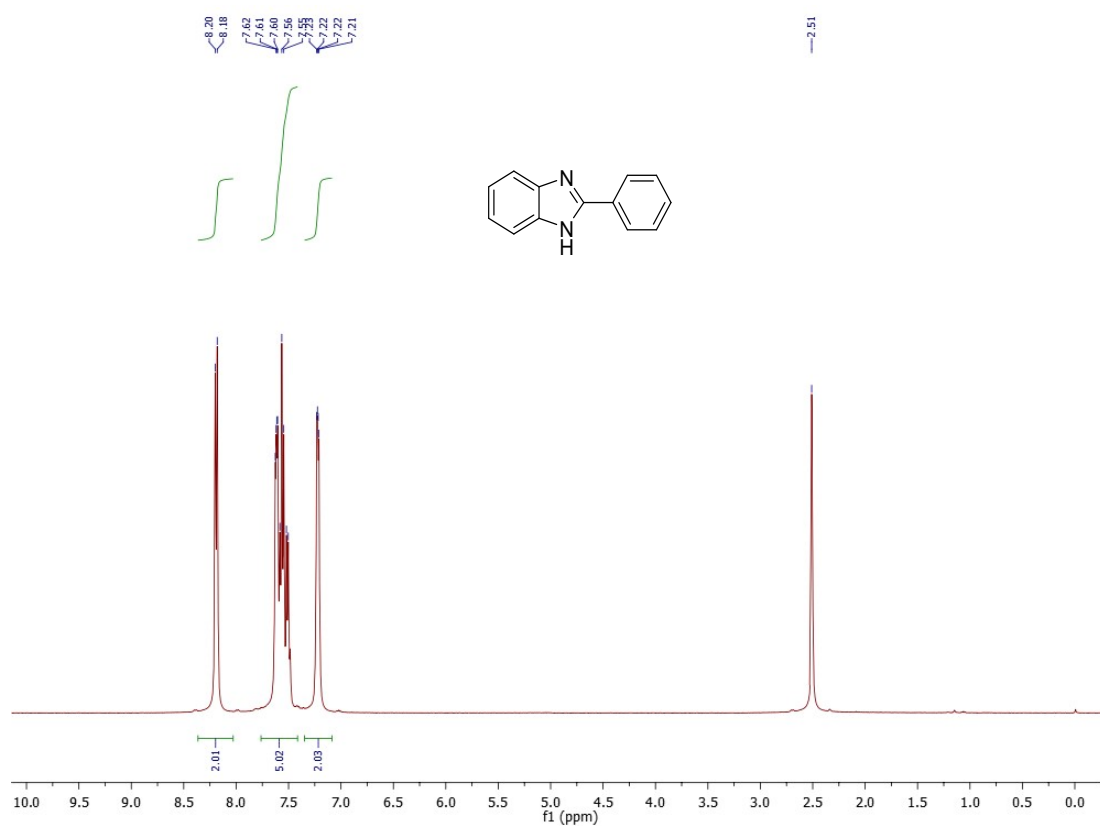

<sup>1</sup>H NMR spectrum of 6a

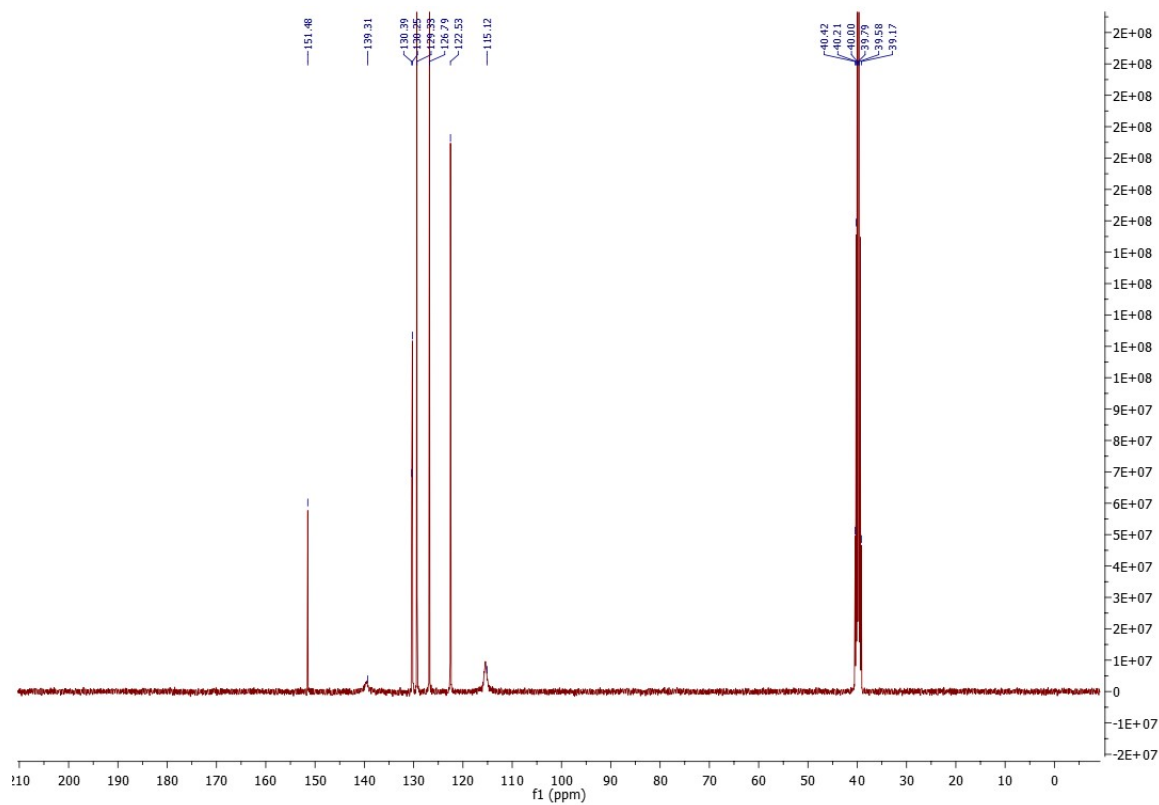

<sup>13</sup>C NMR spectrum of 6a

## 2-(4-Methoxyphenyl)-1H-benzo[d]imidazole (**6b**)

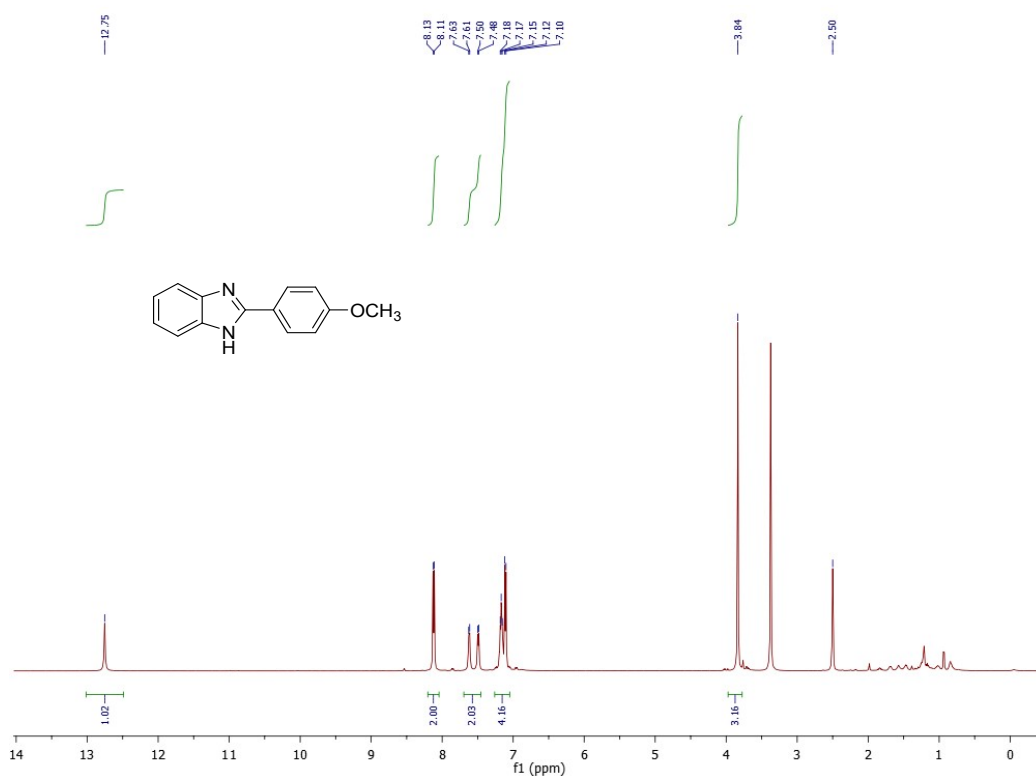

<sup>1</sup>H NMR spectrum of **6b**

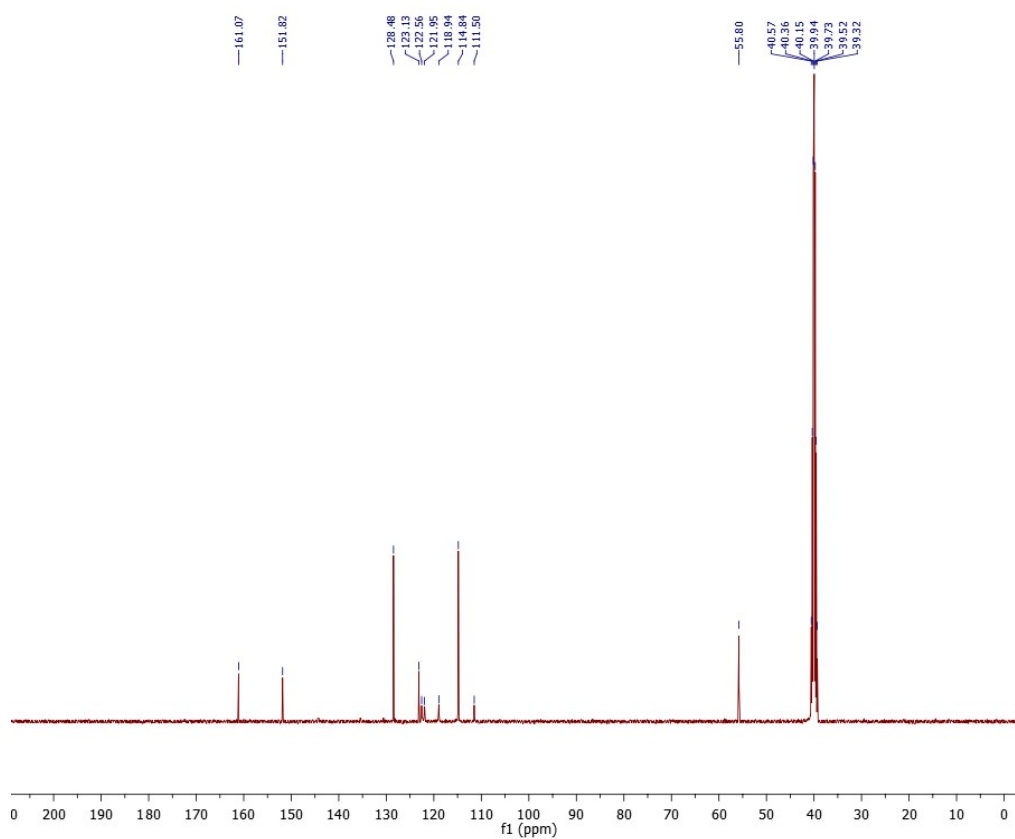

<sup>13</sup>C NMR spectrum of **6b**



## 2-(4-(Trifluoromethyl) phenyl)-1H-benzo[d]imidazole (6c)

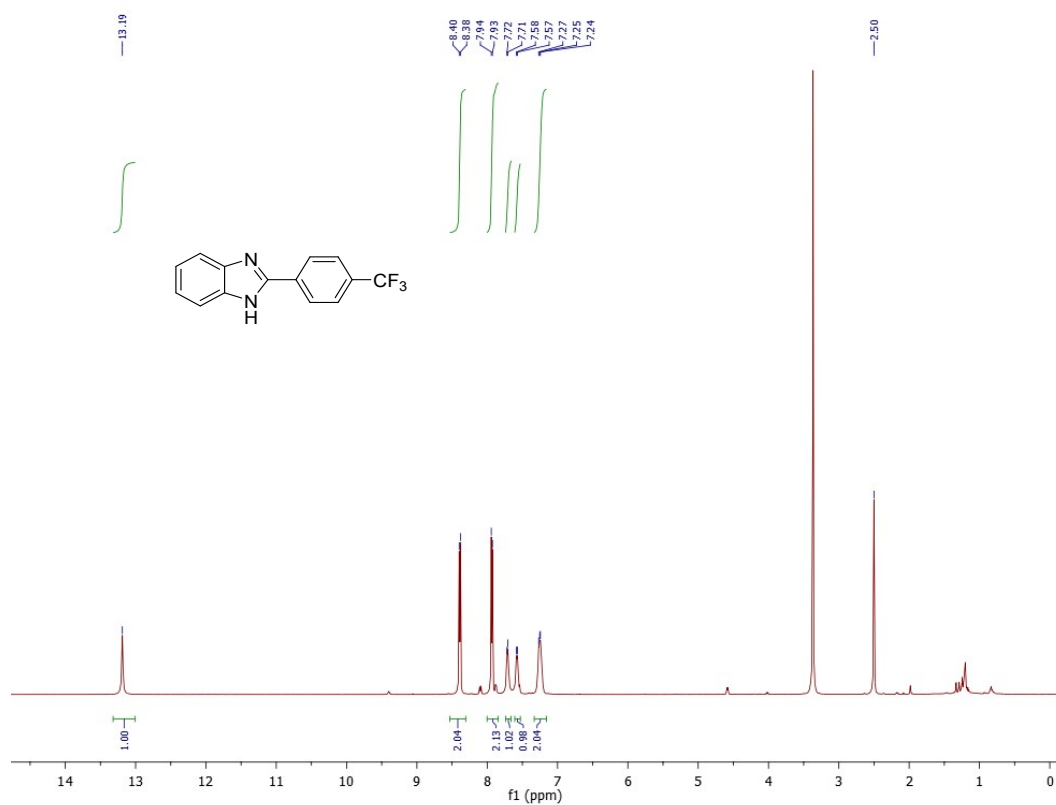

<sup>1</sup>H NMR spectrum of 6c

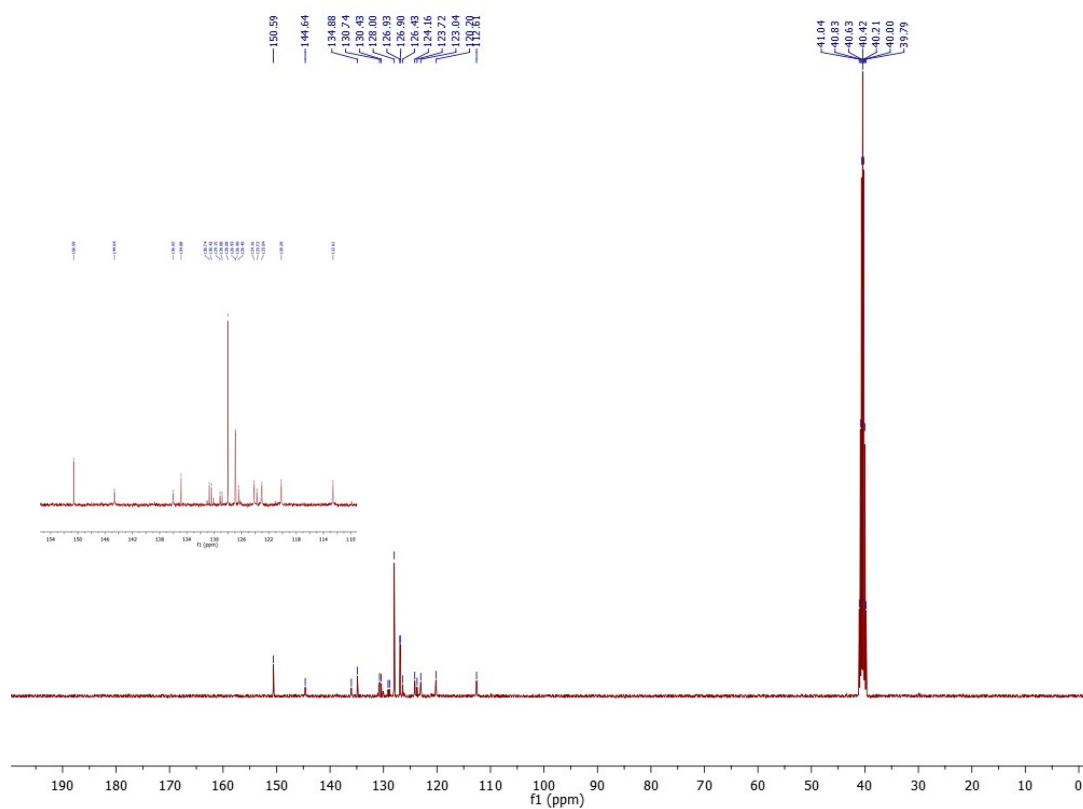

<sup>13</sup>C NMR spectrum of 6c

## 2-Phenylbenzothiazole(6d)

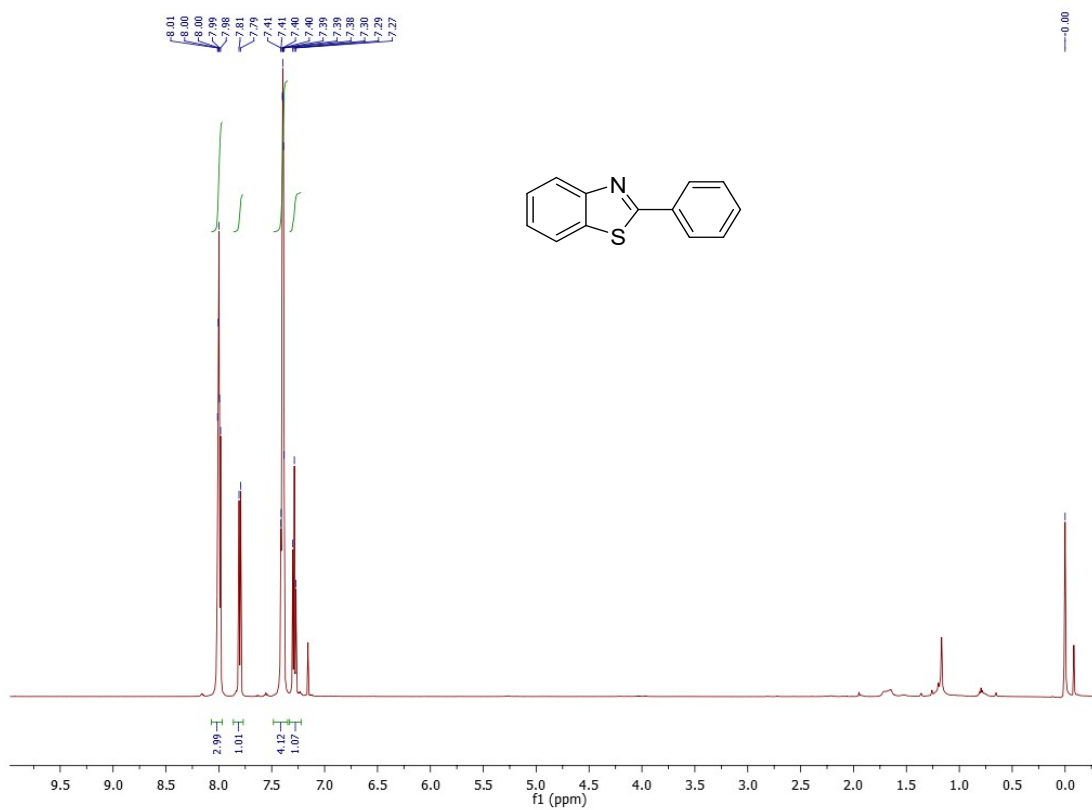

<sup>1</sup>H NMR spectrum of **6d**

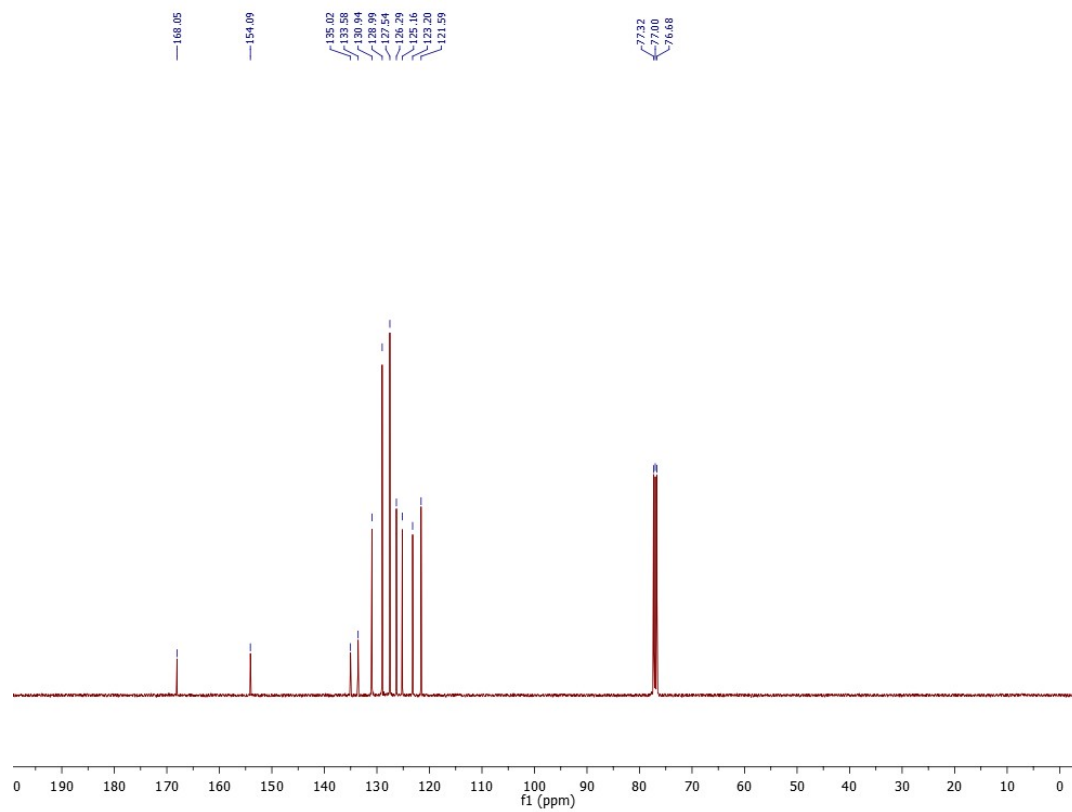

<sup>13</sup>C NMR spectrum of **6d**

## 2-(4-Methoxyphenyl)benzothiazole(6e)

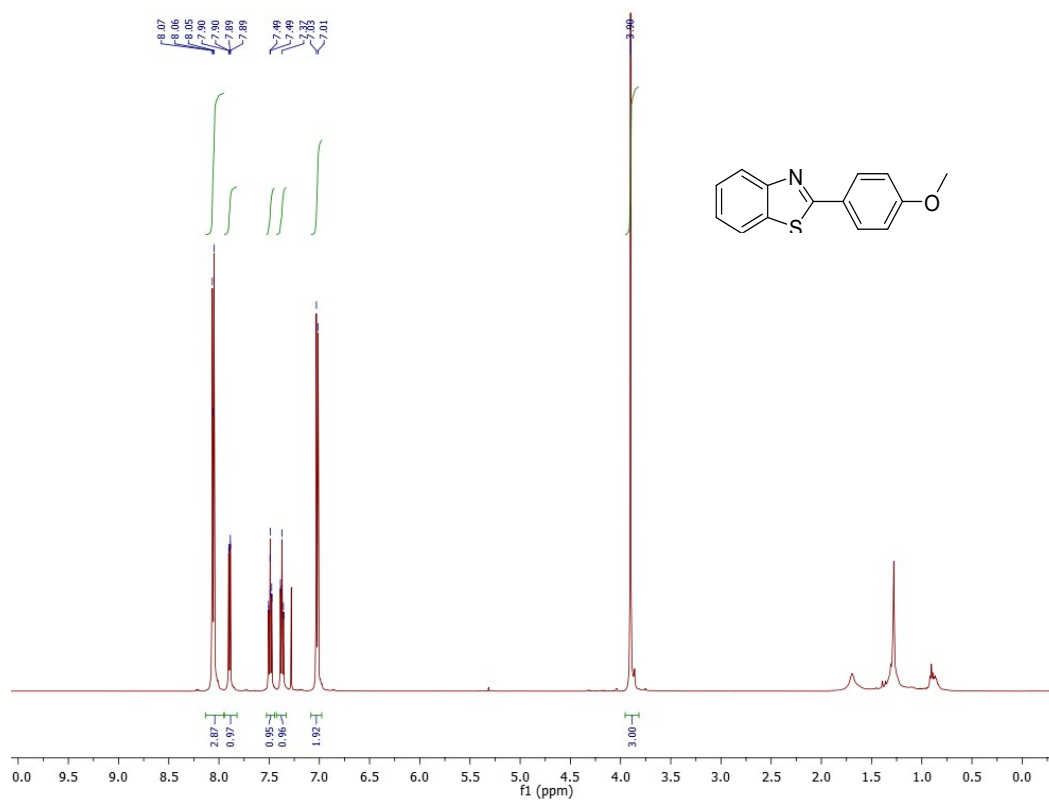

<sup>1</sup>H NMR spectrum of 6e

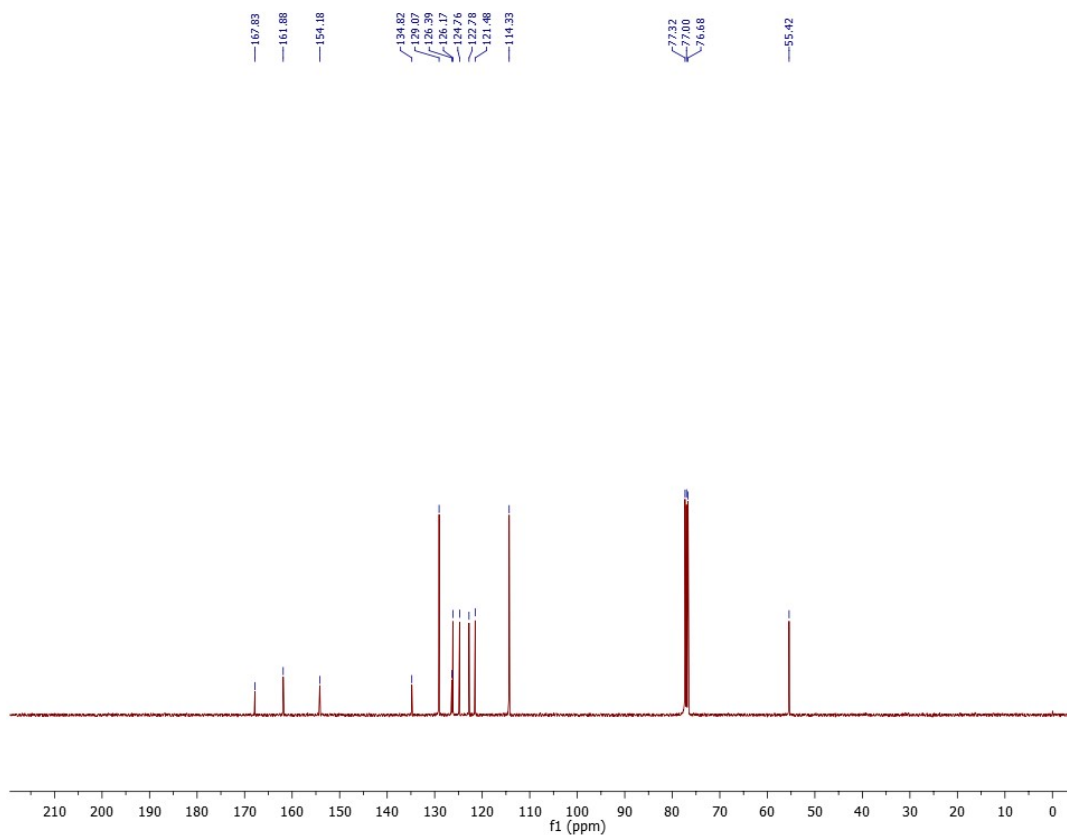

<sup>13</sup>C NMR spectrum of 6e

## 2-(4-Fluorophenyl)benzothiazole(6f)

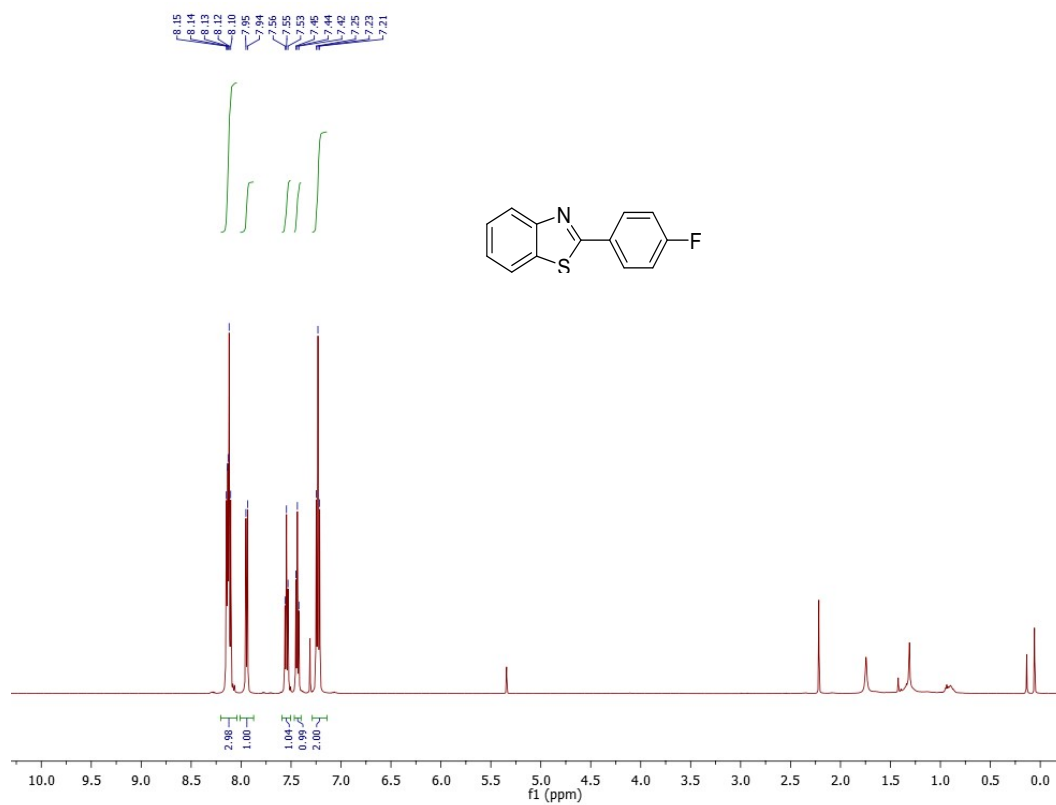

<sup>1</sup>H NMR spectrum of **6f**

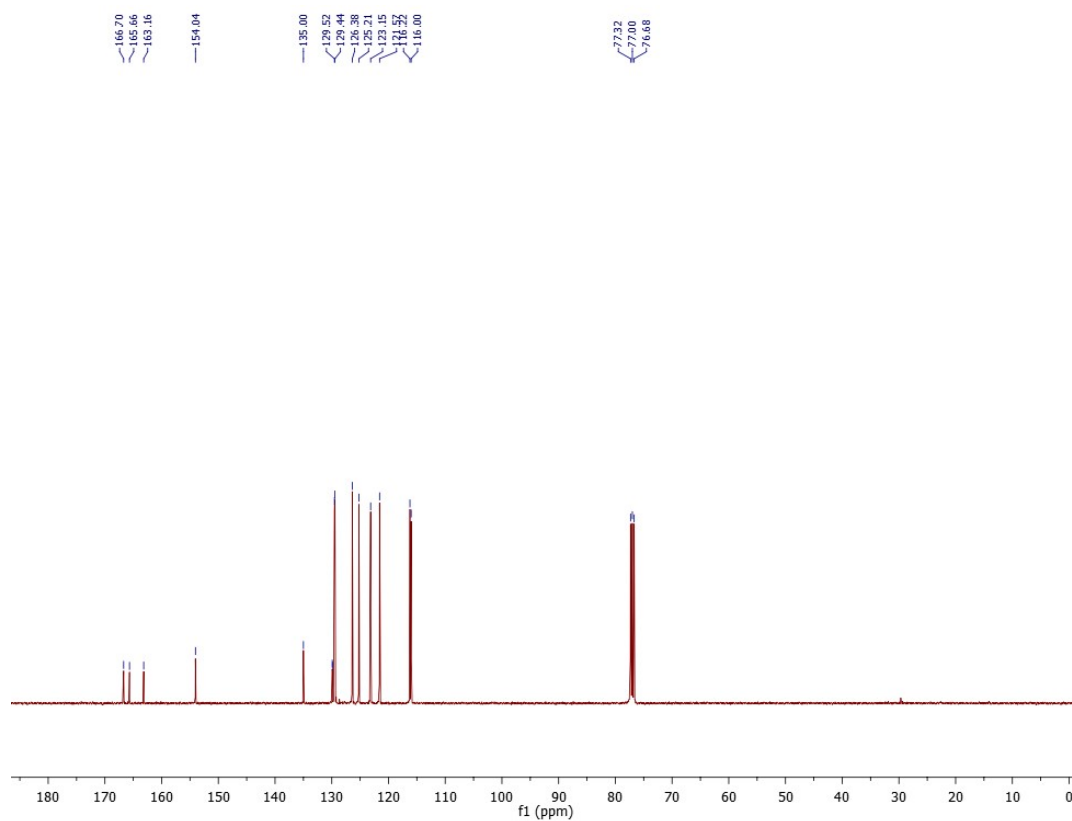

<sup>13</sup>C NMR spectrum of **6f**



## 2-(4-Methoxyphenyl)quinazolin-4(3H)-one (6h)

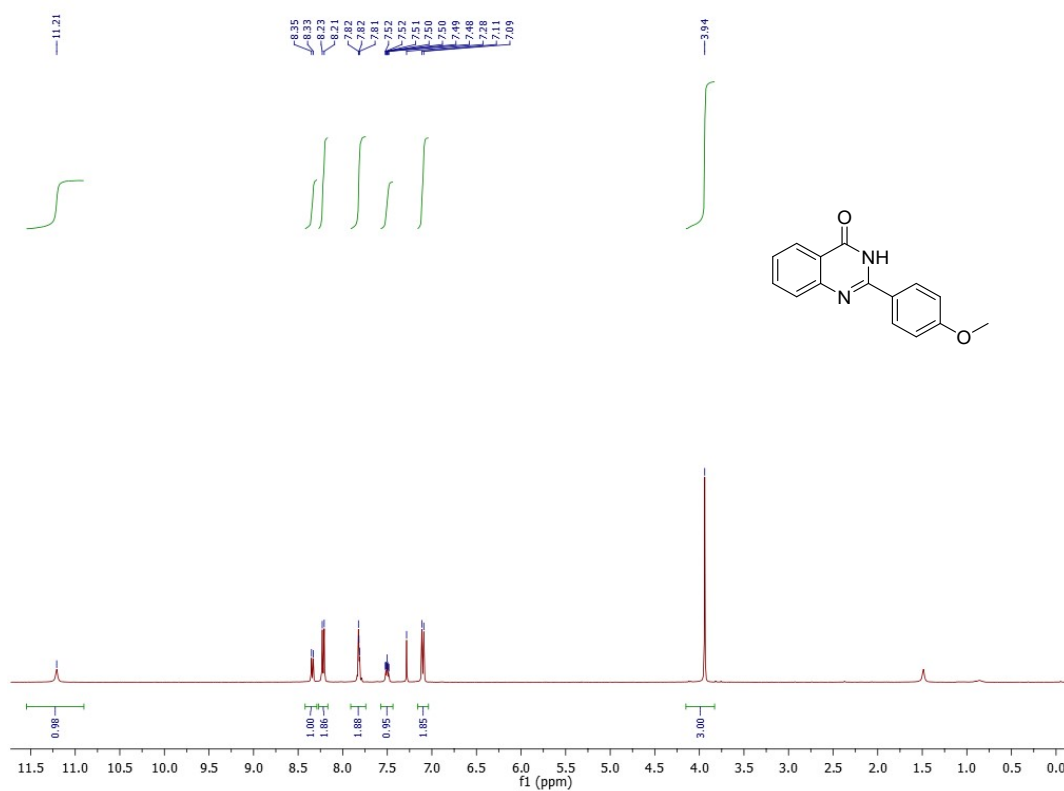

<sup>1</sup>H NMR spectrum of 6h

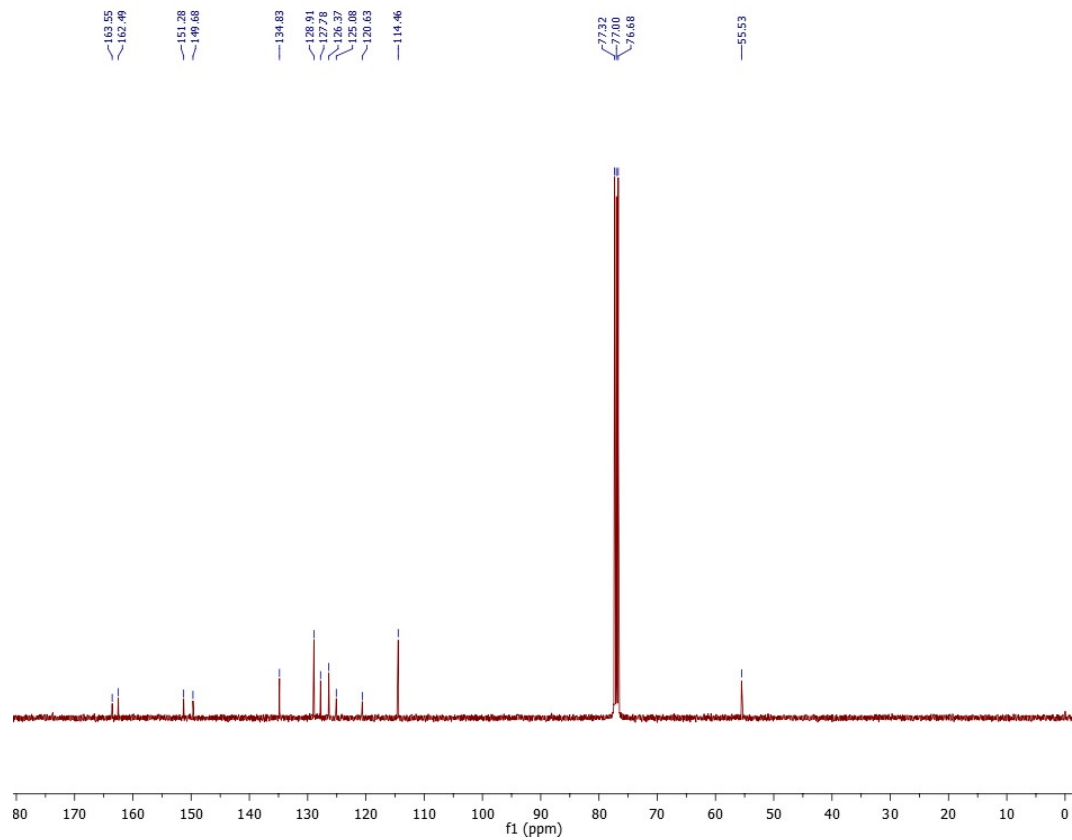

<sup>13</sup>C NMR spectrum of 6h

## 2-Benzylidenemalononitrile (6i)

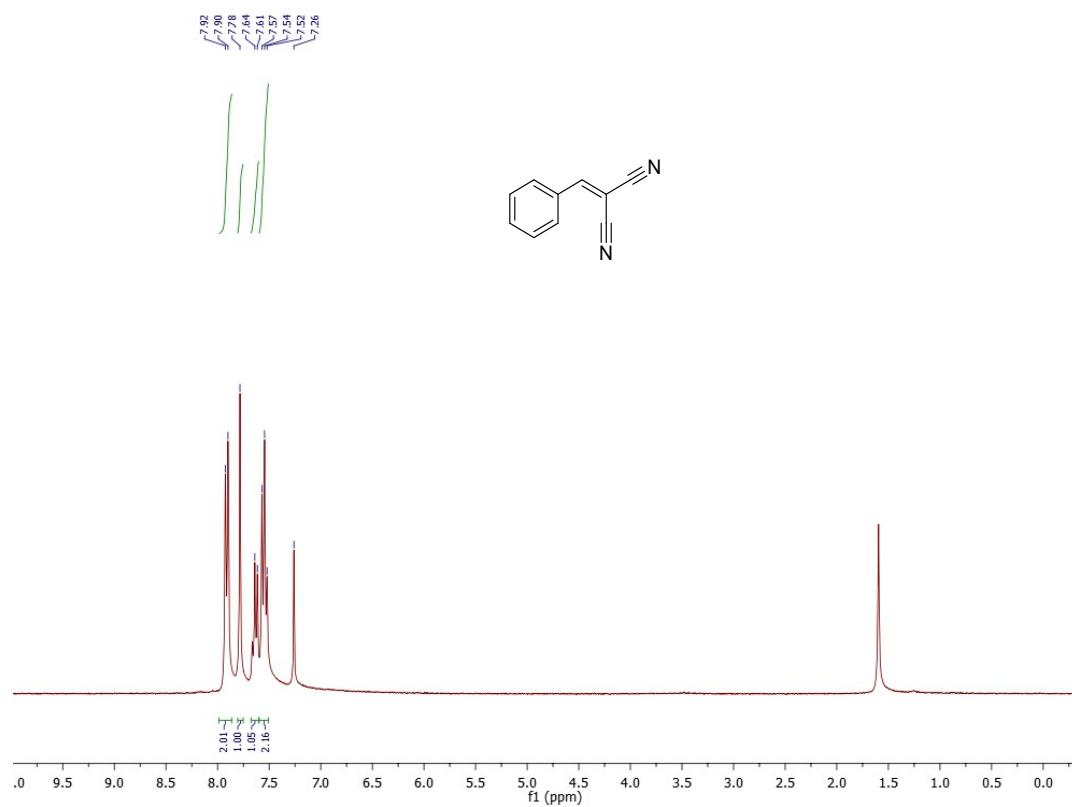

<sup>1</sup>H NMR spectrum of **6i**

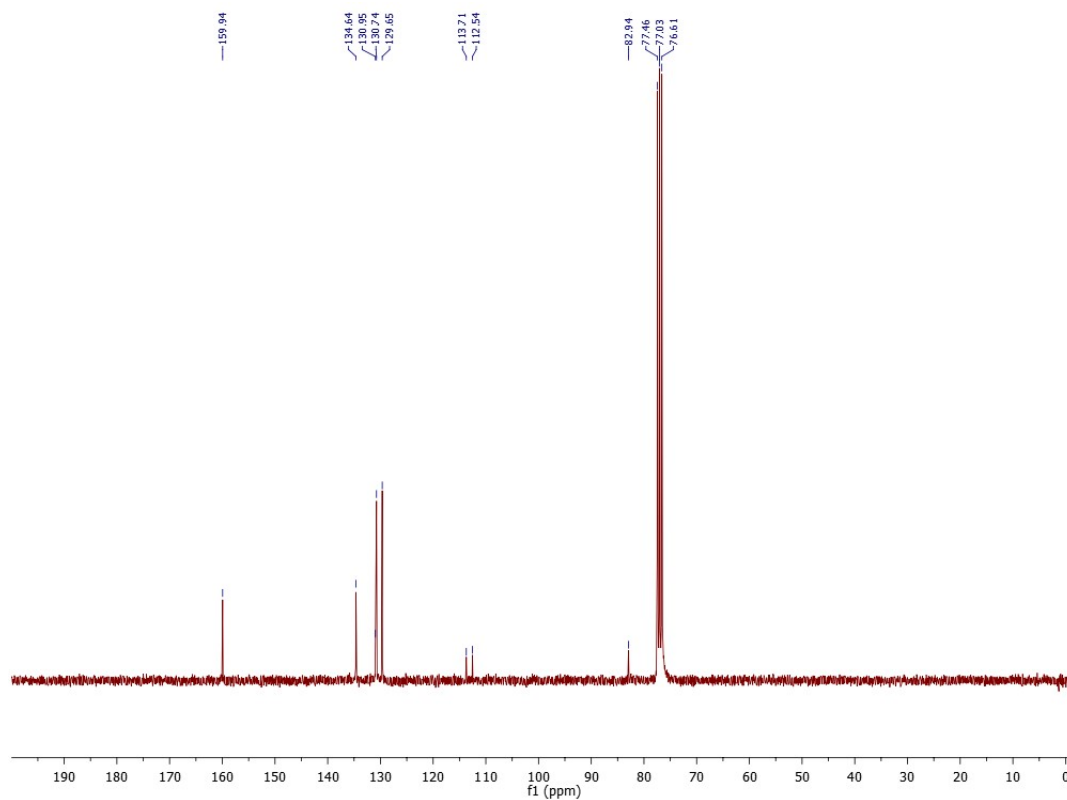

<sup>13</sup>C NMR spectrum of **6i**

## 2-(4-Methoxybenzylidene)malononitrile (**6j**)

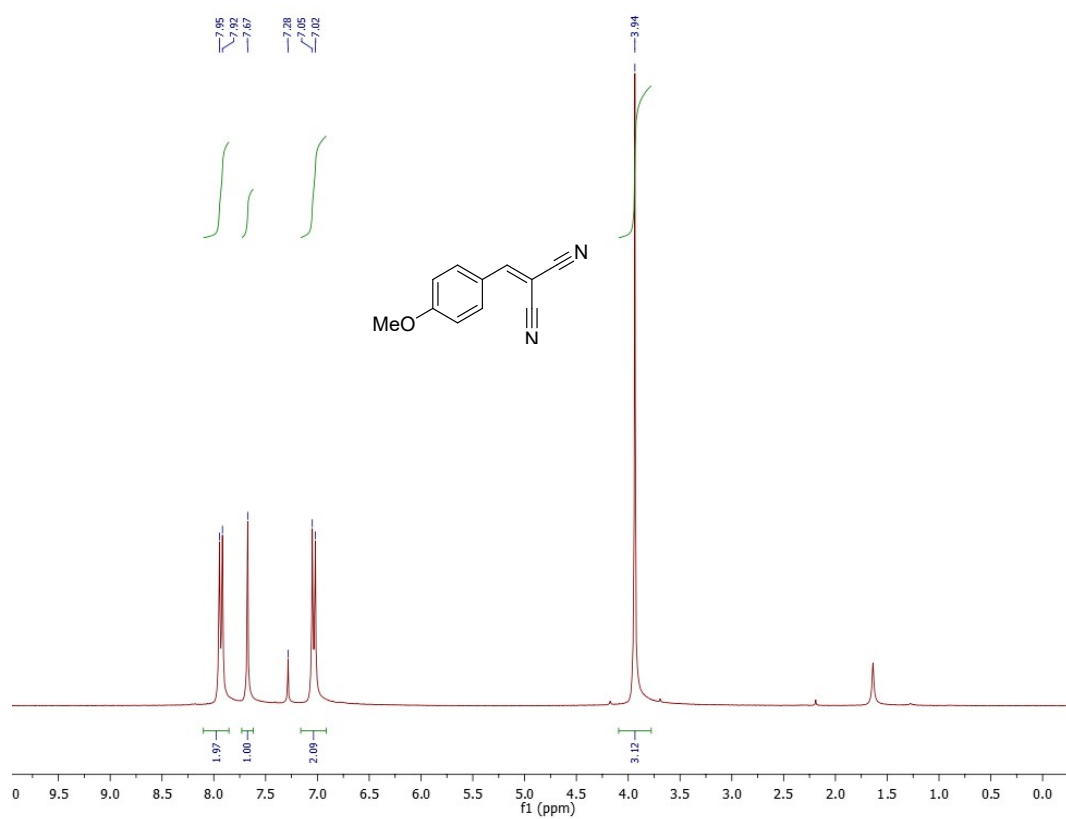

<sup>1</sup>H NMR spectrum of **6j**

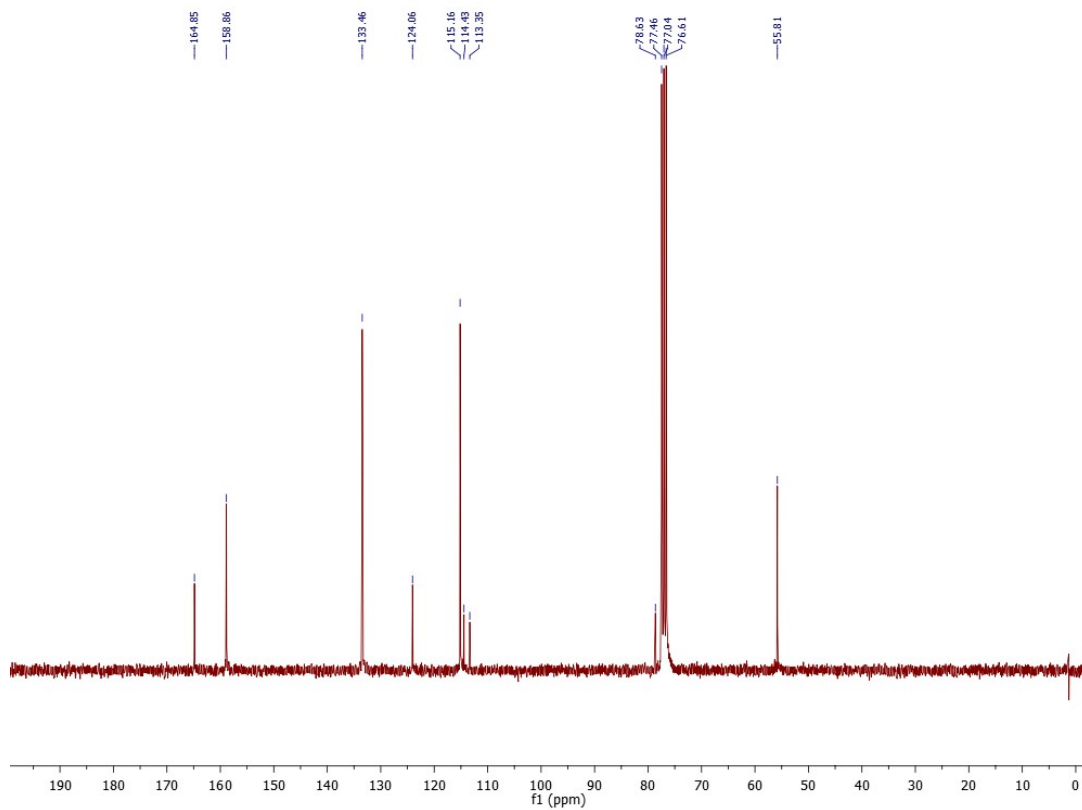

<sup>13</sup>C NMR spectrum of **6j**



## 2-(Naphthalen-2-ylmethylene)malononitrile (6k)

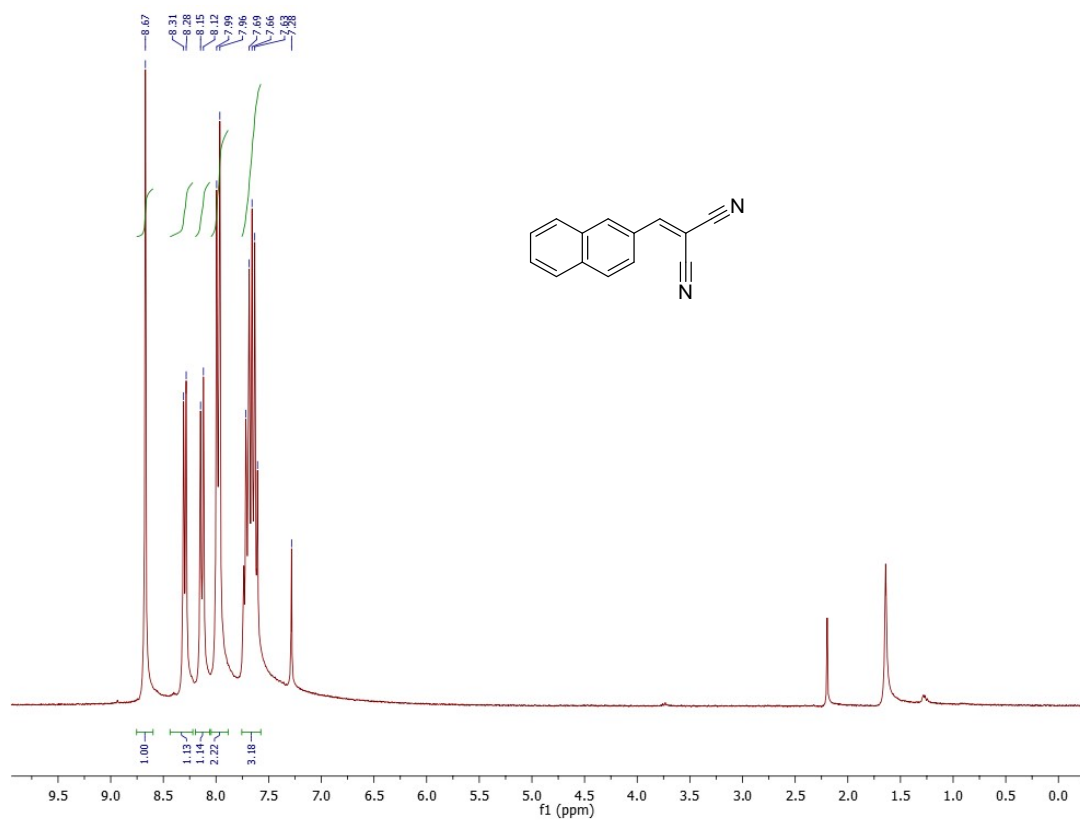

<sup>1</sup>H NMR spectrum of 6k

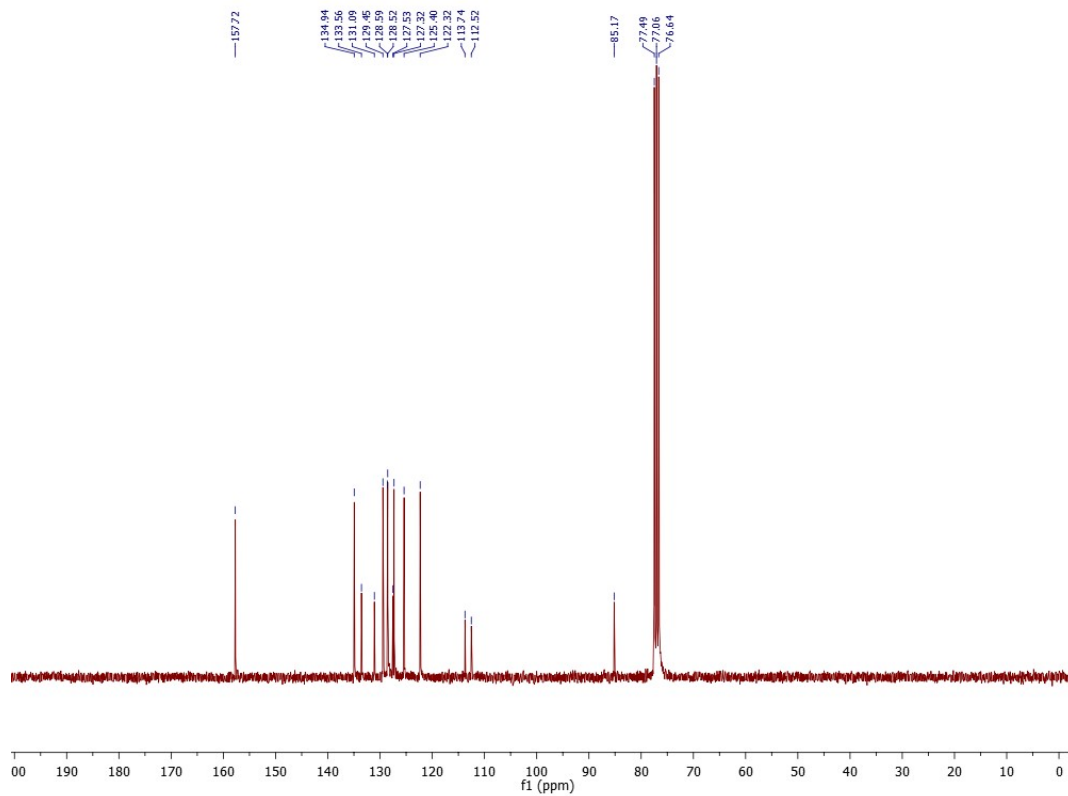

<sup>13</sup>C NMR spectrum of 6k

## 2-(4-(Dimethylamino)benzylidene)malononitrile (61)

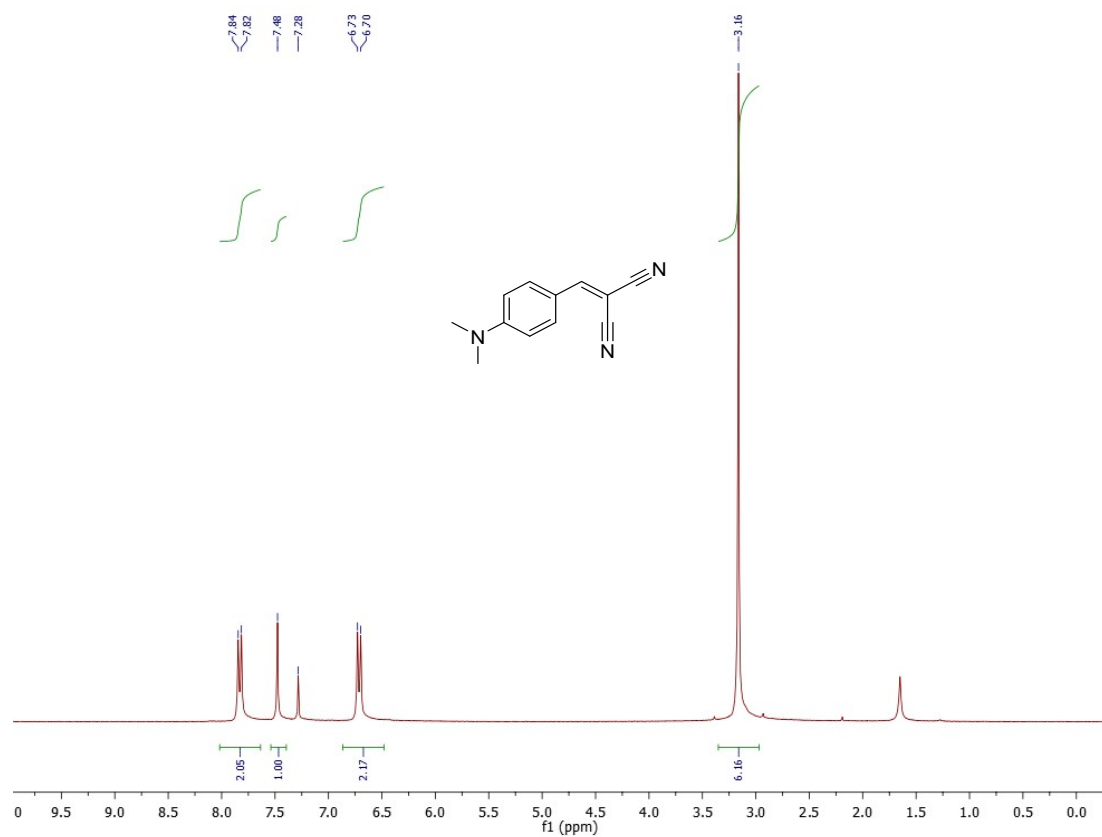

<sup>1</sup>H NMR spectrum of 61

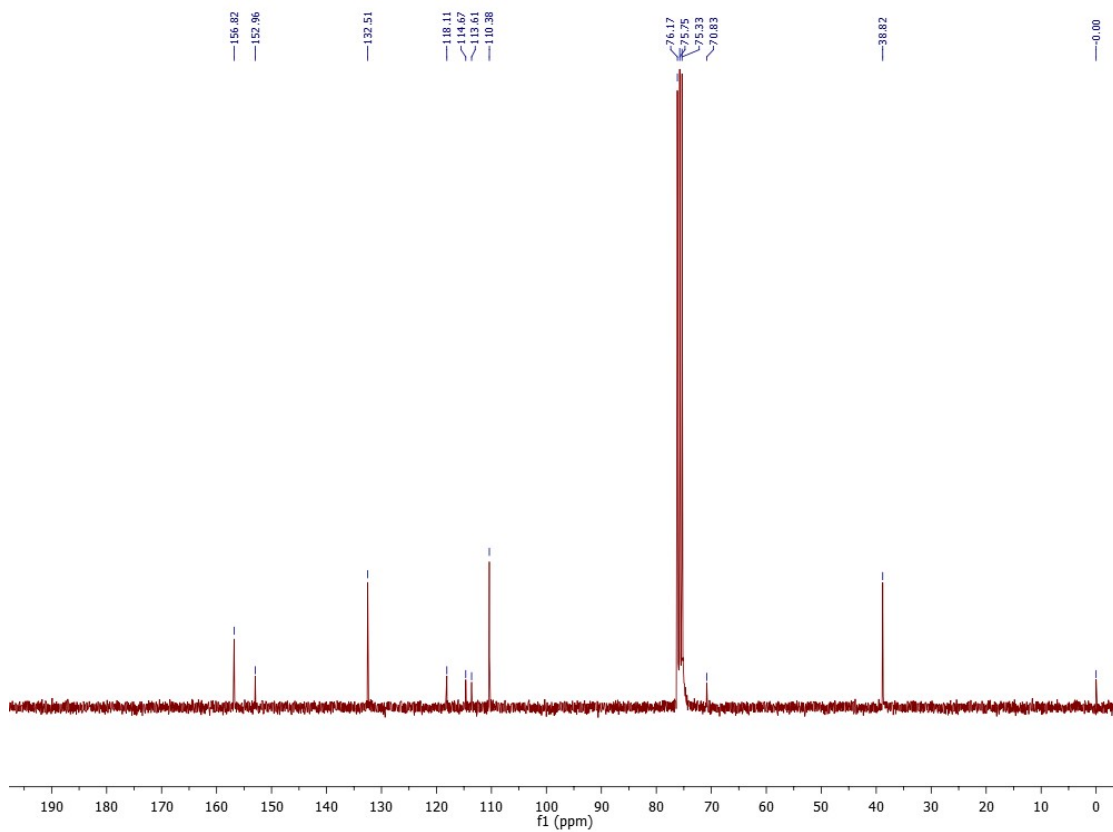

<sup>13</sup>C NMR spectrum of 61

## 2-(4-Chlorobenzylidene)malononitrile (**6m**)

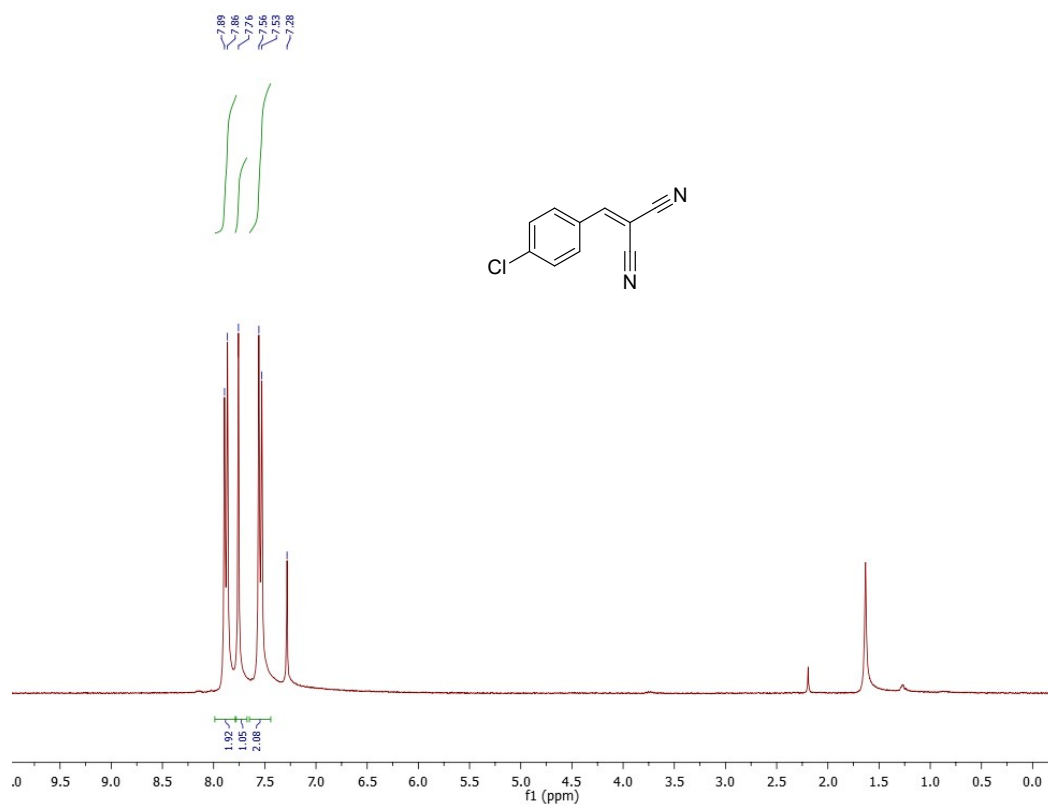

<sup>1</sup>H NMR spectrum of **6m**

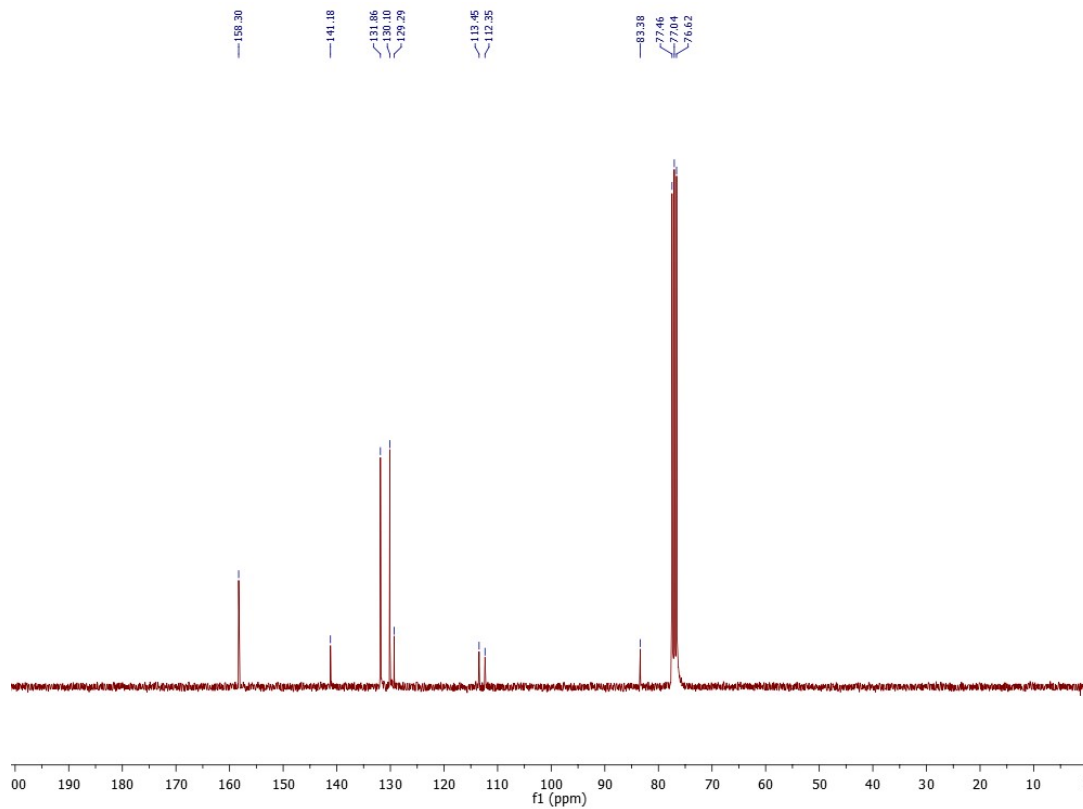

<sup>13</sup>C NMR spectrum of **6m**

## 2-(2-Fluorobenzylidene)malononitrile (6n)

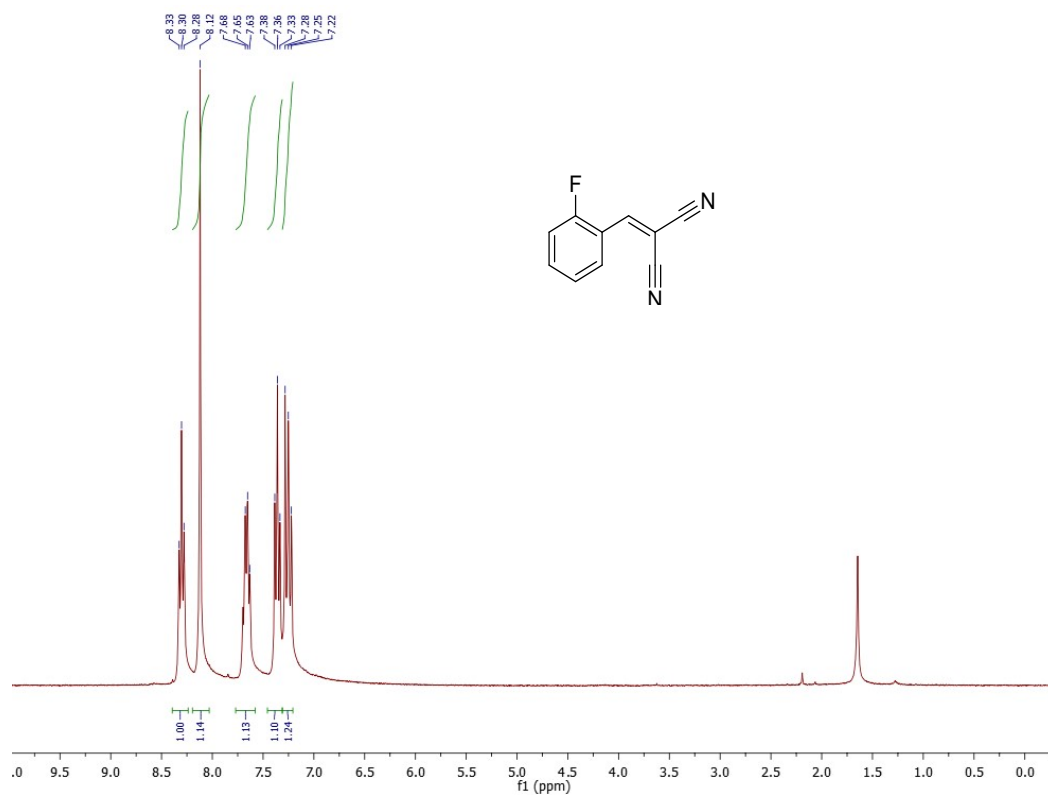

<sup>1</sup>H NMR spectrum of 6n

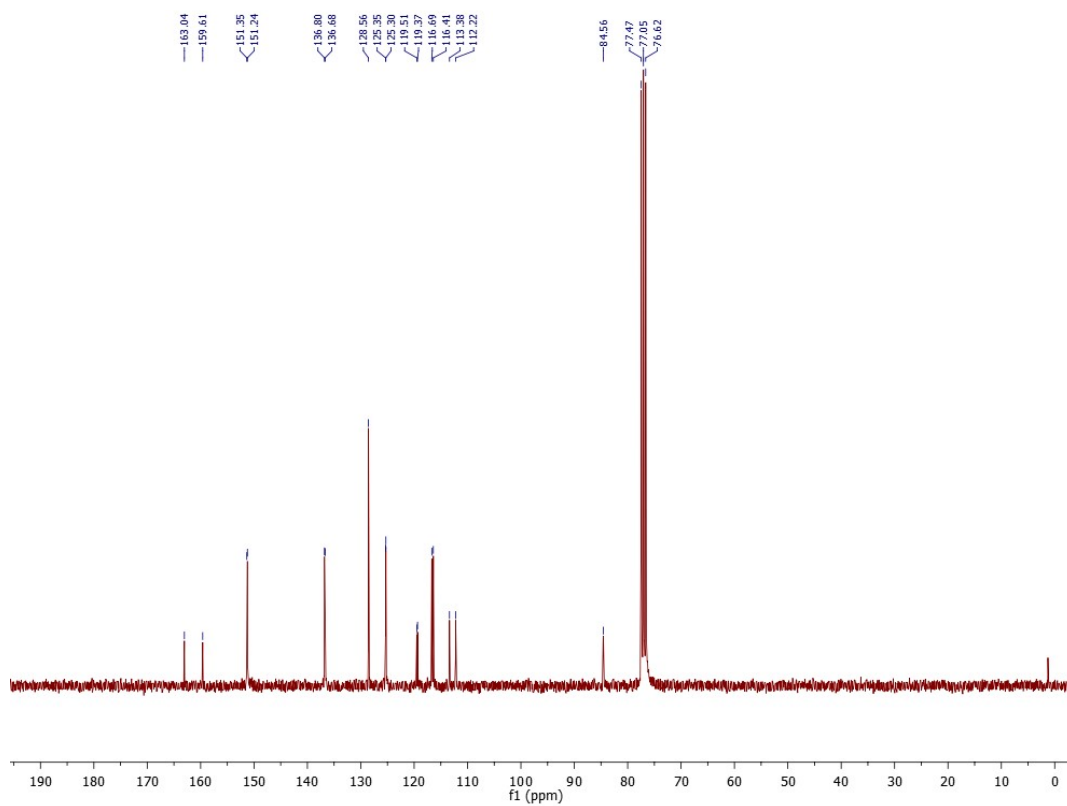

<sup>13</sup>C NMR spectrum of 6n

## 2-(4-Nitrobenzylidene)malononitrile (**60**)

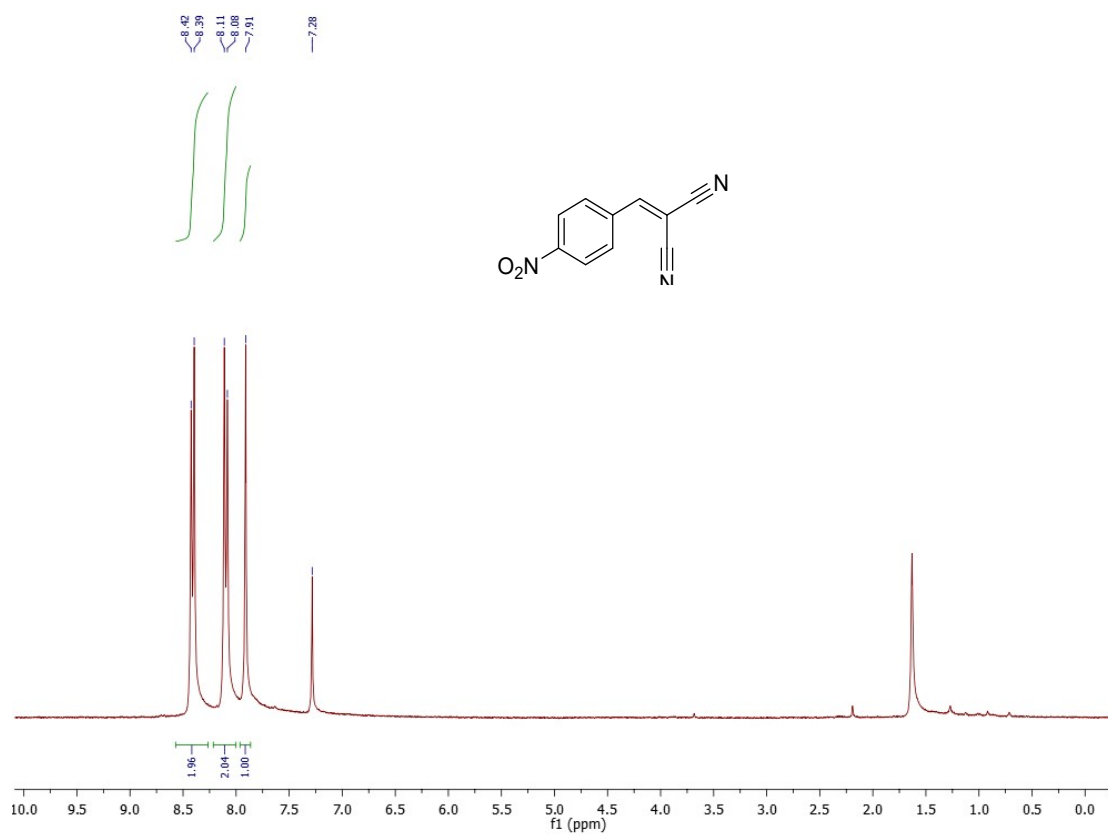

<sup>1</sup>H NMR spectrum of **60**

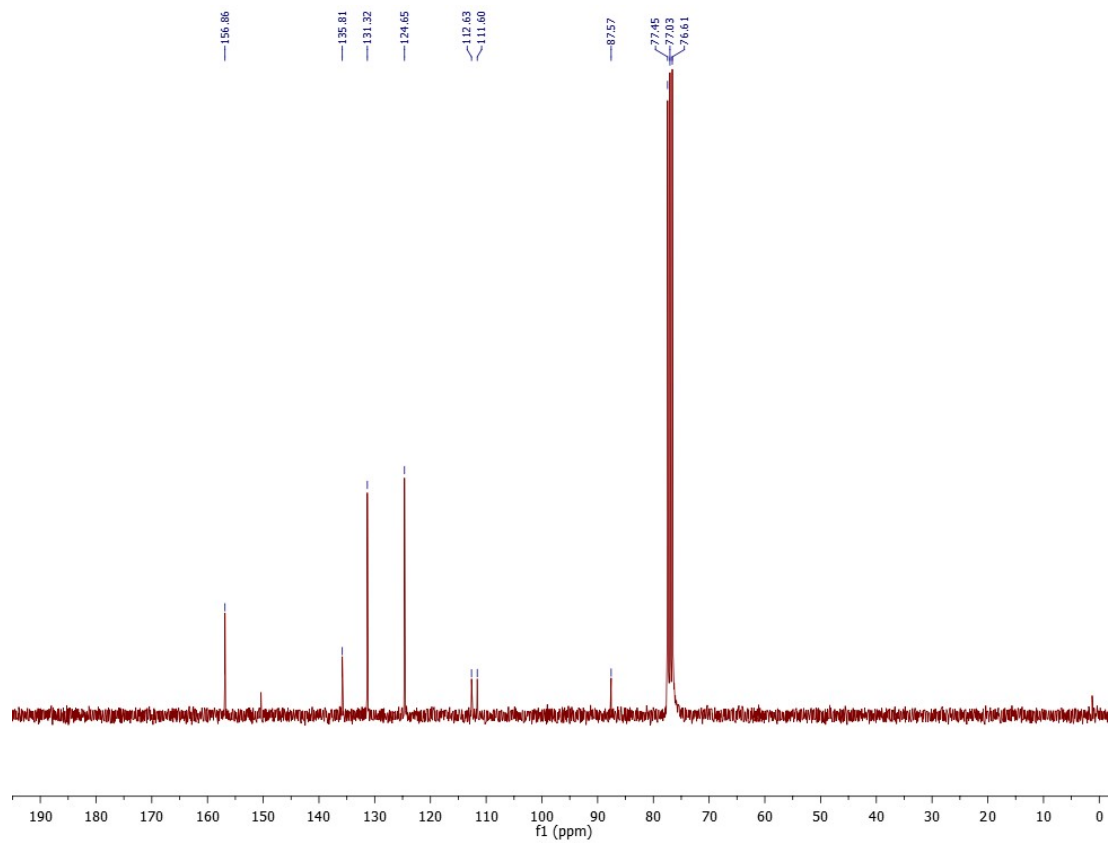

<sup>13</sup>C NMR spectrum of **60**

## References

1. G. Kresse, J. Furthmüller, *Comput. Mater. Sci.*, 1996, **6 (1)**, 15–50.
2. P. E. Blöchl, *Phys. Rev. B*, 1994, **50 (24)**, 17953–17979.
3. G. Kresse, D. Joubert, *Phys. Rev. B*, 1999, **59 (3)**, 1758–1775.
4. J. P. Perdew, K. Burke, M. Ernzerhof, *Phys. Rev. Lett.* 1996, **77 (18)**, 3865–3868.
5. S. Grimme, S. Ehrlich, L. Goerigk, *J. Comput. Chem.* 2011, **32 (7)**, 1456–1465.
6. H. Bux, C. Chmelik, J.M. van Baten, R. Krishna, and J. Caro, *Advanced Materials*, 2010, **22**, 4741-4743.
7. Strauss, A. Mundstock, M. Treger, K. Lange, S. Hwang, C. Chmelik, P. Rusch, N.C. Bigall, T. Pichler, H. Shiozawa, and J. Caro, *ACS applied materials & interfaces*, 2019, **11**, 14175-14181.
